# 1 **Understanding the effect of pulse width on activation depth in TENS: A** 2 **computational study**

3  
4 Alexander Guillen<sup>1¶</sup>, Dennis Q Truong<sup>1¶</sup>, Yusuf O. Cakmak<sup>2</sup>, Sheng Li<sup>3</sup>, Abhishek Datta<sup>1,4\*</sup>

5  
6 <sup>1</sup> *Research and Development, Soterix Medical, Woodbridge, NJ, United States of America*

7 <sup>2</sup> *Department of Anatomy, University of Otago, Dunedin, New Zealand.*

8 <sup>3</sup> *Department of Physical Medicine and Rehabilitation, McGovern Medical School at The University of Texas*  
9 *Health Science Center at Houston, Houston, TX, United States of America*

10 <sup>4</sup> *Biomedical Engineering, City College of New York, New York, NY, United States of America*

11  
12 <sup>¶</sup> *Authors 1 and 2 have equally contributed to the article*

13  
14 \*[adatta@soterixmedical.com](mailto:adatta@soterixmedical.com) (AD)

## 17 **Abstract**

18  
19 *Background:* Transcutaneous electrical nerve stimulation (TENS) has been a commonly used modality to relieve  
20 aches and pain for over 40 years. Commercially available devices provide multiple therapy modes involving a  
21 different combination of frequency and pulse width with intensity. While frequency sets sensation, intensity helps  
22 determine tolerability, longer pulse width is reported to induce a feeling of deeper stimulation. In fact, longer  
23 pulse width has been empirically shown to deliver current into deeper tissues, but in context of other electrical  
24 stimulation modalities. The goal of this study was to unpack the relationship between pulse width and activation  
25 depth in TENS.

26 *Methods:* A highly realistic, anatomically-based, 3D finite element model of the forearm was used to simulate the  
27 electric field (E-field) distribution, as the pulse width is varied. A typical titration-guided mechanism was used to  
28 obtain the strength-duration (S-D) curves of a sensory McIntyre-Richardson-Grill (MRG) axonal model  
29 simulating the pain-transmitting A-delta fibers. The pulse widths tested ranged from 30  $\mu$ s to 495  $\mu$ s.

30 *Results:* As expected, shorter pulse widths required more current to achieve activation, resulting in a larger E-  
31 field. The S-D curve of the target median nerve indicates a rheobase of 1.75 mA and a chronaxie of 232  $\mu$ sec.  
32 When the applied currents are the same, shorter pulse widths result in a smaller volume of tissue activated (VTA)  
33 compared to the longer pulse widths. A 21 fold difference in VTA was found between the longest and shortest  
34 pulse widths considered. We observed a linear relationship between pulse width and activation depth for the  
35 conditions tested in the study.

36 *Conclusion:* Our findings highlight the impact of pulse width on activation depth. While choice of a given therapy  
37 mode is usually based on an *ad-hoc* desirable sensation basis, medical professionals may consider advocating a  
38 certain therapy mode based on the depth of the intended target nerve.

## 40 **Introduction**

41  
42 Pain is the body's response to injury or illness. Usually, the body heals and the pain goes away, but for  
43 many people, the pain persists long after the cause has gone away. The Centers for Disease Control and Prevention  
44 (CDC) estimates that 20.4% (50 million) of American adults suffer from chronic pain and, of which 8% (19.6  
45 million) live with high-impact chronic pain [1]. Chronic pain is defined by the International Association for the  
46 Study of Pain (IASP) to be pain persisting beyond typical tissue healing time, which is generally considered to be  
47 3 months [2]. Common types of chronic pain include back, headache, joint, neck, hip, and osteoarthritis pain [3].  
48 Although treatment typically includes pharmacological approaches, one non-pharmacological and non-invasive  
49 option recommended by some clinicians for its convenience and effectiveness is Transcutaneous electrical nerve  
50 stimulation (TENS) therapy [4].

51 Studies suggest that TENS helps reduce pain via peripheral and central mechanisms. In the central system,  
52 TENS activates the sites in the spinal cord and brainstem that use opioid, serotonin, and muscarinic receptors;  
53 and through peripheral mechanisms — opioids and  $\alpha$ -2-noradrenergic receptors that intervene in the induction of  
54 analgesia [5]. Using small battery-powered devices, the modality typically delivers biphasic, symmetric or  
55 asymmetric, rectangular or square pulses through cutaneous electrodes positioned near the painful area [6]. They

56 can be applied with varying frequencies, from low (< 10 Hz) to high (> 50 Hz), or mixed frequencies [7]. In  
57 general, higher-frequency stimulation is delivered at sensory intensity, and low-frequency stimulation is delivered  
58 at motor intensity [6]. At sensory intensity, patients may experience strong but comfortable sensations without  
59 movement contractions, whereas at high intensity they can feel painless motor contraction.

60 The early evolution of TENS has been characterized by a faster rate of development of clinical applications  
61 rather than determining optimal parameters [8]. This has been compounded by the fact that use for low back pain  
62 was “grandfathered” in the United States. As TENS for low back pain was marketed prior to the 1976 medical  
63 device regulation act, it was allowed to stay in commerce, and therefore TENS efficacy for low back pain was  
64 never “premarket approved”. Newer devices could thereby, obtain marketing “clearance” based on demonstrating  
65 equivalence to prior devices based on technology (stimulation parameter) comparison. As there was no motivation  
66 for device manufacturers to develop proper clinical utility and generate high quality efficacy data, clinical  
67 evidence has continued to be debated [3,4]. Newer indications such as TENS for migraine and sinus pain have  
68 however demonstrated definitive clinical utility [9-11]. TENS devices are considered medium risk (Class 2)  
69 devices and are available for both prescription and OTC use.

70 Commercially available TENS devices for peripheral pain provide multiple therapy modes with each  
71 mode delivering a different combination of frequency and pulse width with intensity. Users are asked to screen  
72 through available modes and settle on the mode that provides the “most desirable sensation / comfort”. While  
73 frequency selection allows to set desired sensory or motor contraction, intensity generally maps to tolerability,  
74 longer pulse width is suggested to induce a feeling of deeper stimulation.

75 Studies exploring the effects of pulse width / duration over the years, have mostly studied physiological  
76 responses and not the exact relationship to activation depth in TENS. Li and Bak 1976 [12] showed that isolated  
77 excitation of different nerve groups (motor, sensory, pain-conducting fibers) may be easier with a short duration  
78 pulse. Effects on pulse width on the arm have reproduced basic relationships between pulse duration and current  
79 intensity found in prior literature [13, 14]. Specifically, Alon et al., 1983 [8] demonstrated that pain thresholds  
80 mediated by pain-conducting fibers in healthy subjects resulted in reducing pain thresholds (350 mA - 30 mA) as

pulse duration was increased ( $5 \mu\text{s} - 1000 \mu\text{s}$ ). Further, stimulus pulse width may also be used to selectively recruit fibers of different sizes [15]. Some efforts do however come close in context of related electrical stimulation modalities. Increasing pulse width was empirically shown to improve current penetration by reaching distant muscles from surface electrodes in neuromuscular electrical stimulation (NMES) [16]. In the context of invasive DBS, increasing pulse width has been shown to lead to activation at greater distances from electrode center (or deeper stimulation) [17, 18]. Further, long pulse width stimulation has been shown to penetrate and activate deeper muscles in functional electrical stimulation [19, 20].

The goal of this computational study was to investigate the effect of the pulse width in TENS on the arm. A high anatomically realistic finite element model was used to simulate the induced electric field (E-field) distribution. The E-field is then coupled to a sensory neuron model given TENS's efficacy is predicated on providing pain relief by exciting sensory nerves. We evaluated strength-duration (S-D) curve and volume of tissue activated (VTA). The VTA map was related to pulse width to provide insight on the effect of pulse width on activation depth.

## Methods

### Geometry setup

The computational study was performed using Sim4Life (V7.0.1, Zurich MedTech, Zurich, Switzerland) incorporating NEURON solver (v7.2.3.12730). Sim4Life is a simulation platform that combines human phantoms with relevant physics solvers for analyzing real-world biological problems. The model geometry used in the study corresponds to the right arm of the Yoon-sun V4-0 dataset [21]. The model incorporates high resolution data ( $0.1 \times 0.1 \times 0.2 \text{ mm}$ ) making it possible to resolve and thereby segment nerves, arteries, veins, and other small structures. Importantly for this study, it includes all major nerve trajectories from the cranium and spinal cord to internal organs and muscles and has been used in other peripheral nerve stimulation studies [22, 23]. The relevant tissue properties for this study are presented in **Table 1** and based on the IT'IS material parameter database [24]. Precisely, the model in **Figure 1A** consists of a pair of stimulation electrodes placed on the wrist with the goal of

targeting the medial nerve. The electrodes are placed along the length of the medial nerve and only serves as an exemplary placement to study the effect of pulse width. The major underlying layers that comprise the model are further indicated in **Figures 1B** and **1C**. The electrode and interfacing gel combination have a radius of 3 mm with a combined total thickness of 2 mm.

**Figure 1: Arm geometry and tissue composition.** (A) indicates the position of the stimulation electrodes targeting the median nerve. (B) indicates the subcutaneous adipose tissue (SAT) layer. (C) indicates other underlying tissues such as muscle, nerves, bone, etc. Note: Refer to **Table 1** for all tissues considered in the model and their corresponding electrical conductivities.

**Table 1: Tissue electrical conductivities (S/m) used in the model**

| Tissue                            | Conductivity | Tissue          | Conductivity |
|-----------------------------------|--------------|-----------------|--------------|
| Skin                              | 0.1482       | Tendon/ligament | 0.3675       |
| Bone (Cancellous)                 | 0.0804       | Muscle          | 0.4610       |
| Bone (Marrow)                     | 0.1797       | Air             | 0            |
| Bone (Cortical)                   | 0.0063       | Blood           | 0.6624       |
| Fat                               | 0.0776       | Nerve           | 0.3475       |
| Subcutaneous adipose tissue (SAT) | 0.0776       | Gel electrode   | 1.7          |

## Nerve trajectories

The intended stimulation region and corresponding nerve anatomy is shown in **Figure 2A**. While the regions of interest are areas in immediate proximity to the stimulation electrodes, overall visualization of anatomical details in the considered geometry is helpful, to relate to induced E-field and VTA plots. As is known, five specific nerves appear from the cords as the terminal branches of the brachial plexus: musculocutaneous, axillary, radial, median and ulnar nerves. The musculocutaneous nerve provides motor innervation to the muscles of the anterior compartment of the arm [25]. The median nerve (comprising C6-T1 spinal roots) predominantly provides motor innervation to the flexor muscles of the forearm and hand [26]. The radial nerve innervates most of the skin of the posterior forearm, the lateral dorsum of the hand, and the dorsal surface of the lateral three and a half digits. Lastly, the ulnar nerve carries both sensory and motor fibers and supplies sensory cutaneous innervation to the medial forearm, medial wrist, and medial one and one-half digits [25].

129 The longest trajectories of the ventral and dorsal roots of C6 and T1 were considered for analysis here (**Figure**  
130 **2B**) due to the expected direct influence on the mid-forearm - based on electrode locations. The nerve depth from  
131 skin in contact with electrodes to the median nerve is about 5.5 mm, the radial nerve is about 13.1 mm, and the  
132 ulnar nerve is 14.9 mm. The three “point sensor” locations along the nerve trajectory used for collecting the  
133 simulation data (i.e. nodes 520, 550, and 580) are illustrated in **Figure 2C**. There were therefore 18 point sensors  
134 considered: 9 (ventral rami) and 9 (dorsal rami).

135  
136  
137 **Figure 2. Nerve anatomy in the arm and locations evaluated.** (A) Available terminal branches of the brachial plexus nerves  
138 (musculocutaneous, radial, median, and ulnar) highlighting anatomical detail in geometry. (B) The longest nerve trajectories were  
139 subsequently considered for simulation. For instance, (C6,6) refers to the nerve segment in the cervical section (C6) with 6 being the  
140 specific trajectory number. The ulnar nerve has 1,2,3,5,6 trajectories in the thoracic section but we consider the longest trajectory (6),  
141 or (T1,6). (C) Point sensor locations. The nodes (520,550,580) indicate the exact location of simulation data collection.

### 143 **Injected current**

144 The low-frequency electromagnetic (EM LF) - Ohmic Quasi-Static module, a rectilinear LF solver, was used to  
145 simulate TENS on the arm at multiple pulse widths (30, 88, 146, 262, and 495  $\mu$ s) corresponding to the range  
146 typically available in commercial TENS stimulators. Dirichlet boundary conditions were applied as 2.38 V and -  
147 2.38 V at the anode and cathode corresponding to 5 mA of current flux calculated on the electrodes. Other external  
148 boundaries were electrically insulated (i.e. normal current density = 0). The Ohmic quasi-static field

$$150 \quad \nabla \cdot \sigma \nabla \phi = 0 \quad (2.1)$$

151  
152 was solved with the aforementioned boundary conditions for the electric potential distribution [27-29]. The  
153 injected current was then re-calculated based on the titration factor (see section on Titration mechanism) to  
154 visualize differences in the E-field between the different pulse widths.

155

## 156 **Neuron model and additional simulation considerations**

157 TENS is known to stimulate sensory nerves, suppressing the pain signals being sent to the brain to give user relief.  
158 We therefore considered the sensory McIntyre-Richardson-Grill (MRG) neuron model [30,31], with a diameter  
159 of 5  $\mu\text{m}$ , to simulate the effects of pain-transmitting nerve fibers. The MRG model is based on a double-cable  
160 representation of the axon that allows separating electrical representations of the myelin and underlying internodal  
161 axolemma. The model has been used for neural predictions in a variety of applications [18, 32, 33]. For simulating  
162 TENS using the titration mechanism, the modulation pulse type was set to bipolar with a unitless amplitude of 1  
163 and an interphase interval of 0.1 ms while varying the pulse widths. The duration and time step were set to 3.5  
164 ms and 0.0025 ms respectively. Running a simulation for the aforementioned nodes of interest at one pulse width  
165 took approximately 4 hours using 64 threads on a workstation with the following specifications: AMD Ryzen  
166 Threadripper 3970X 32-Core Processor, 3.70 GHz CPU speed, and 192 GB installed RAM.

167

## 168 **Titration mechanism**

169

170 Titration involves stimulating an axon with a series of pulses of *increasing* intensity to find the threshold at which  
171 a single action potential is generated in excitable cells. This method introduces an additional scaling factor that is  
172 titrated until a response can be detected within the stimulated region [34, 35] . Thus, the excitability threshold ( $I_T$ )  
173 is the product of the current applied to the cellular membrane of the axon, the aforementioned titration factor (T),  
174 and the modulating pulse ( $a(t)$ ):

175

$$176 \quad I_T(t) = I.T.a(t) \quad (2.2)$$

177

178 The T parameter is considered as a scaling factor to indicate proportion or a multiple of the actual modulated  
179 current needed to generate an action potential. Potential and current can be used interchangeably here for  
180 measuring the stimulus strength.

181

## 182 **Volume of Tissue Activated**

183 The volume of tissue activated (VTA) was used to compare stimulation differences caused by changes in pulse  
184 width. The VTA around each electrode contact relied on the concept of activation function (AF), which was  
185 calculated from the eigenvalues of the Hessian matrix [36]. Each eigenvalue of the Hessian matrix represents the  
186 second partial derivative of the electric potential along the respective eigenvector. A multi-step process was used  
187 to determine the VTA due to pulse width variation. This involved determining the excitability threshold ( $I_T$ ),  
188 using the corresponding electric potential to calculate the AF, and subsequently utilizing the AF to determine the  
189 VTA.

190

191

## 192 **Results**

193

### 194 **Electric Field (E-field)**

195 The induced *surface* E-field plots due to the shortest and the longest pulse widths, calculated at their  
196 corresponding titration factors (see **Table 2**) and plotted to the same scale, are included in **Figure 3**. The plots  
197 reveal that the smaller pulse width (30  $\mu$ s) induces a larger E-field (max: 456 V/m) — covering a larger area of  
198 the arm. On the other hand, the induced E-field due to 495  $\mu$ s is less diffuse, more focused, and has lower  
199 magnitude from the same pair of electrodes. However, this is intuitively expected, as the plots are generated at  
200 their respective stimulation threshold, so the 30  $\mu$ s E-field is the result of 19.7 mA and the 495  $\mu$ s E-field is the  
201 result of injecting 1.75 mA. The overall spatial profile resembles a stretched ellipse with the major axis along the  
202 line connecting the stimulation electrodes. The ulnar and radial nerves that are farther away from the electrode  
203 sites receive less E-field ( $\sim$  0-132 V/m). With longer pulse width, the induced E-field profile in the immediate



vicinity of the electrode sites indicates a restricted hot-spot with dramatic fall-off (~40-280 V/m) and approximately 0-23 V/m for the rest of the nerves.

**Figure 3. Surface plot of induced E-field on the arm due to the shortest and longest pulse widths considered.** The E-field was calculated based on the current due to their corresponding titration factor: for 30 $\mu$ s, input current was 19.7 mA and for 495 $\mu$ s, 1.75mA.

### Titration Factor

As previously stated, the titration technique was employed to find the threshold potential of membrane depolarization. **Table 2** notes the individual titration factors needed for the roots (C6 and T1). As expected, the titration factor is substantially smaller for the 495  $\mu$ s pulse in comparison to the 30  $\mu$ s pulse. While the titration factors of dorsal and ventral sections for the C6 roots are the same, they differ somewhat for the T1 roots. Further, as anticipated, minimum titration factors were needed in the branches of the median nerve due to the proximity to the electrode sites.

**Table 2. Titration factor at chosen sensor locations.** Titration factor for the shortest (30 $\mu$ s) and longest (495 $\mu$ s) pulse duration at sensor nodes (520,550,580). As expected, minimum titration factors were needed for the superficial median nerve with the highest values needed for the ulnar nerve.

| C6 dorsal            |       | C6 ventral           |       | T1 dorsal           |       | T1 ventral          |       |
|----------------------|-------|----------------------|-------|---------------------|-------|---------------------|-------|
| Median (30 $\mu$ s)  | 3.93  | Median (30 $\mu$ s)  | 3.93  | Ulnar (30 $\mu$ s)  | 81.55 | Ulnar (30 $\mu$ s)  | 76.57 |
| Median (495 $\mu$ s) | 0.34  | Median (495 $\mu$ s) | 0.34  | Ulnar (495 $\mu$ s) | 11.31 | Ulnar (495 $\mu$ s) | 10.87 |
| Radial (30 $\mu$ s)  | 35.57 | Radial (30 $\mu$ s)  | 35.57 |                     |       |                     |       |
| Radial (495 $\mu$ s) | 3.21  | Radial (495 $\mu$ s) | 3.21  |                     |       |                     |       |

### 3.3 Strength-Duration Curve

The resulting strength-duration (S-D) curve of the median nerve under electrical stimulation is shown in **Figure 4**. For the range of 30-495  $\mu\text{s}$  considered here, the rheobase was found to be  $\sim 1.75$  mA with a chronaxie of  $\sim 232$   $\mu\text{s}$ . Consistent with the theory, the curve tends to flatten out with longer stimulus duration (or pulse width).

**Figure 4. Strength-Duration (S-D) curve of the target median nerve.** A pulse width range of 30-495  $\mu\text{s}$  was considered in the study. The corresponding excitability threshold for each pulse width is noted along the curve.

### 3.4 Volume of Tissue Activated (VTA)

The VTA maps illustrate isosurface plots derived from the absolute value of Hessian matrix eigenvalues of the electric potential. Since the Hessian matrix is essentially a matrix of the second partial derivative of the electric potential, it enables determination of the classic activating function in 3D [37, 38]. To facilitate a direct comparison across the range of pulse widths considered, we plotted the VTA maps at one common current value—i.e. the average threshold current (10.73 mA) spanning the shortest and longest pulse widths (**Figure 5**). As expected, the shortest pulse width requires the highest threshold to activate tissue near the input source and is approximately a factor of 11 higher with respect to the longest pulse width ( $8.8 \text{ e}^5 / 7.82 \text{ e}^4$ ). The estimated VTA for the shortest and widest pulses were 118.72  $\text{mm}^3$  and 2,586.24  $\text{mm}^3$  respectively, indicating a VTA ratio of 21.2.

**Figure 5. Median nerve activating function (AF) and volume of tissue activated (VTA) at a fixed current amplitude (10.73 mA).** Figures show the isosurface plots of the second spatial derivative of electric potential at the AF threshold for the median nerve. Each row is the result of a simulated pulse width in ascending order (30, 88, 146, 262, 495  $\mu\text{s}$ ).

The value of this study is exemplified by observing the shape and pattern of the VTA maps. While VTA investigation in invasive applications such as DBS reveal uniform “blobs” around the electrode contacts reflecting *one* brain region [17, 39], the maps here are scattered and irregular, due to varying complex anatomy. This is only

250 captured due to the realistic arm geometry considered here. The VTA maps also help visualize the influence of  
251 pulse width on activation depth. The plots in the first column indicate that for pulse widths up to 146  $\mu$ s, it is not  
252 possible to recruit the deeper radial and the ulnar nerves. At the longest pulse width, there is some activation at  
253 the levels of the deeper nerves of the arm.

### 254 **Influence of the pulse width with respect to activation depth**

255 To understand the influence of pulse width on activation depth, we plotted predicted VTA with respect to the  
256 varying pulse widths considered (**Figure 6**). We note a linear relationship for the range of pulse widths considered  
257 here.

258  
259  
260 **Figure 6. Volume of tissue activated (VTA) vs pulse width at a fixed current amplitude (10.73 mA).** VTA is used as a surrogate  
261 for activation depth. For the range of pulse widths and conditions considered here, the relationship is linear.

## 262 **Discussion**

263  
264  
265 The central aim of this study was to unpack the relationship between pulse width and activation depth  
266 during TENS on the arm. Prior electrical stimulation studies using other modalities have empirically shown that  
267 wider pulses can recruit deeper targets. Using a highly detailed 3D model, we provide enhanced visualization of  
268 available geometry, induced E-field profile, VTA maps, and relationship to activation depth, for the first time.

269 The S-D curves for nerve stimulation have clearly established its shape over numerous investigations  
270 dating back to the 30's. Given the dominant electrical capacitance of the neural membrane, S-D curves expectedly  
271 follow a capacitor discharge curve. A TENS practitioner can therefore readily use the inverse relationship between  
272 intensity and pulse width to make an informed stimulation strategy choice. Now longer pulse widths at the same  
273 current would lead to more charge delivered across the membrane- presumably translating to deeper stimulation.  
274 However, the exact relationship has not been explored previously in TENS. Further for non-invasive electrical  
275 nerve stimulation applications, lowering pulse width in order to deliver higher current intensity is limited to the

276 intensity at which the user can comfortably receive stimulation [40]. This restriction is however not applicable  
277 for invasive delivery [18] as stimulation does not have to navigate superficial cutaneous sensation.

278 The linear relationship between VTA and pulse width observed in our simulations indicates that longer  
279 widths would lead to deeper activation. We note that our observations are restricted to only the pulse widths and  
280 the concomitant geometry (arm) considered here. We expected the relationship to asymptote at higher pulse  
281 widths as the excitability threshold reaches rheobase. While the excitability threshold in the S-D curve (**Figure**  
282 **4**) follows a hyperbolic or exponential decay similar to classical equations (Weiss-Lapique and Lapique-Blair  
283 [41, 42]), the VTA expands with a similar convexity resulting in a *net* linear VTA - pulse width relationship. We  
284 suspect this is due to (1) volume being cubic and (2) the Hessian of voltage dropping exponentially away from  
285 the electrodes. There are several limiting assumptions to the plot. We are considering only the magnitude of the  
286 Hessian, which does not account for orientation / alignment with any possible axon. The AF thresholds were  
287 calibrated for the median nerve A-delta fiber running along the length of the arm; other nerve orientations and  
288 fiber types would be expected to respond differently. Further, heterogeneous tissues cause spikes in E-field and  
289 AF at material boundaries.

290 TENS efficacy is likely predicated upon a net effect of stimulating multiple underlying nerves of various  
291 types and not just the A-delta fiber considered here. We also note that we simply used the median nerve in this  
292 study as a test nerve to explore relationships between E-field, strength, duration, activation depth, etc. However,  
293 the choice of A-delta fiber is rational as nociceptors generally transmit noxious stimuli through A-delta and C-  
294 fiber nerves. Further, it is known that the C-fiber afferents carry slow sensations associated with aches, whereas  
295 the A-delta afferents are associated with fast sensations such as sharp pain. We expect our main results to also  
296 hold for C-fiber median nerves with differences in rheobase and chronaxie values. Given the type of pain felt  
297 and if one were to know underlying nerve depth [43], one could potentially start with a suitable pulse width. In  
298 reality however, pre-programmed therapy modes (combination of pre-set frequency and pulse width) are provided  
299 in TENS devices, limiting full flexibility to the user in parameter selection. Therefore, the best approach continues  
300 to be to try all modes first, and in each case, titrating intensity to the strongest possible but at a level that is

301 comfortable. If deeper pain relief is desired, patients should then pick the next mode with longer pulse width  
302 while maintaining the frequency and intensity from the prior mode.

303 The strength of our modeling process in simulating TENS on the arm is the usage of a highly realistic  
304 model. Previous 3-D FEM approaches have either used idealized geometries such as a cylindrical arm [44-46] or  
305 derived from 2-D anatomical images by extruding geometry [35] and limiting to certain cross sections [32]. The  
306 modeling methodology applied here, from the geometry, applying EM simulations into a dynamic Neuron solver,  
307 using the MRG model, and subsequently using titration analysis, mimics the one employed in the context of  
308 magnetic stimulation (MS) [22]. The simulation setup used in the aforementioned MS study has been further  
309 validated using clinical experiments. Specifically, numerically estimated latencies and waveforms were in  
310 agreement with the empirical measurements on subjects undergoing MS on the arm [23]. The only difference to  
311 our simulation is the application of electrical stimulation and thereby, related governing equation. However, the  
312 governing equation is a standard equation used to predict induced current in volumetric media and has been  
313 validated in other applications [47, 48]. Further, the MRG model has been shown to generate accurate predictions  
314 for TENS specifically, compared to active cable and mammalian nerve models [27, 35]. Taken together, we expect  
315 the main conclusions of this study to be robust.

316 There are practical limitations to increasing the pulse width at the same current intensity to increase  
317 activation depth, namely battery life. The chronaxie is usually considered the most efficient pulse width choice  
318 for conserving the pulse generator's battery life and is naturally a key factor in invasive applications [49]. With  
319 modern day TENS devices powered by high capacity small rechargeable batteries, this is not much of a concern.  
320 However, as mentioned above, we expect the linear relationship to ultimately change and plateau. Promising  
321 solutions such as coupling TENS with a nerve cuff to facilitate activation of deeper nerves has been proposed  
322 [35]. However, nerve cuff involves surgery and moreover, such solutions are still being developed and not  
323 currently available to the practitioner or the patient.

324 Computational modeling and simulation such as the one reported here is now increasingly used across a  
325 range of stimulation modalities, from optimizing delivery, performing safety analysis, to supporting device design

326 / development [29,39 50-53]. Furthermore, these predictions have helped in elucidating stimulation parameter  
327 choices, understanding mechanism of action, explaining stimulation outcome, and thereby advancing stimulation  
328 administration in general [11, 54-57]. We expect this study on the arm to guide researchers in performing future  
329 explorations on other body parts, determine ideal pulse width range for target nerve of interest, attempt validation  
330 using TENS similar to the one performed in MS [23], and investigate new TENS delivery approaches.

## 332 **Author Contributions**

333 AD developed the concept idea. AG and DQT performed the modeling and related post-processing. AG, DQT,  
334 and AD analyzed the results and prepared the initial manuscript draft with important intellectual input from YC  
335 and SL. All authors confirmed the overall methodology, contributed to the final manuscript text, and approved  
336 the submitted version.

## 338 **Conflicts of Interest**

339 AG, DQT, and AD are employees of Soterix Medical. The remaining authors declare that the research was  
340 conducted in the absence of any commercial or financial relationships that could be construed as a potential  
341 conflict of interest.

## 343 **References**

- 344  
345 [1] **Dahlhamer** J, Lucas J, Zelaya, C, et al. Prevalence of Chronic Pain and High-Impact Chronic Pain Among  
346 Adults — United States, 2016. *MMWR Morb Mortal Wkly Rep* 2018;67:1001–1006. DOI:  
347 <http://dx.doi.org/10.15585/mmwr.mm6736a2>  
348  
349 [2] **Mills** SEE, Nicolson KP, Smith BH. Chronic pain: a review of its epidemiology and associated factors in  
350 population-based studies. *Br J Anaesth.* 2019 Aug;123(2):e273-e283.  
351  
352 [3] **Cohen** SP, Vase L, Hooten WM. Chronic pain: an update on burden, best practices, and new advances. *Lancet.*  
353 2021 May 29;397(10289):2082-2097.  
354

355 [4] **Johnson**, M. I., Paley, C. A., Jones, G., Mulvey, M. R., & Wittkopf, P. G. (2022). Efficacy and safety of  
356 transcutaneous electrical nerve stimulation (TENS) for acute and chronic pain in adults: A systematic review and  
357 meta-analysis of 381 studies (the meta-tens study). *BMJ Open*, 12(2).

358  
359 [5] **DeSantana**, J. M., Walsh, D. M., Vance, C., Rakel, B. A., & Sluka, K. A. (2008). Effectiveness of  
360 transcutaneous electrical nerve stimulation for treatment of hyperalgesia and pain. *Current Rheumatology*  
361 *Reports*, 10(6), 492–499.

362  
363 [6] **Vance**, C. G., Dailey, D. L., Rakel, B. A., & Sluka, K. A. (2014). Using TENS for pain control: The  
364 State of the evidence. *Pain Management*, 4(3), 197–209.

365  
366 [7] **Vance**, Carol G., Dailey, D. L., Chimenti, R. L., Van Gorp, B. J., Crofford, L. J., & Sluka, K. A. (2022).  
367 Using tens for pain control: Update on the state of the evidence. *Medicina*, 58(10), 1332.

368  
369 [8] **Alon G**, Allin J, Inbar GF. Optimization of pulse duration and pulse charge during transcutaneous electrical  
370 nerve stimulation. *Aust J Physiother*. 1983 Dec;29(6):195-201.

371  
372 [9] **Riederer F**, Penning S, Schoenen J. Transcutaneous supraorbital nerve stimulation (T-sns) with the cefaly®  
373 device for migraine prevention: a review of the available data. *Pain Therapy*. (2015) 4:135–47. 10.1007/s40122-  
374 015-0039-5

375  
376 [10] **Goldsoebel AB**, Prabhakar N, Gurfein BT. Prospective trial examining safety and efficacy of microcurrent  
377 stimulation for the treatment of sinus pain and congestion. *Bioelectron Med*. 2019 Nov 20;5:18.

378  
379 [11] **Thomas C**, Truong DQ, Lee K, Deblieck C, Androulakis XM, Datta A. Determination of Current Flow  
380 Induced by Transcutaneous Electrical Nerve Stimulation for the Treatment of Migraine: Potential for  
381 Optimization. *Front Pain Res (Lausanne)*. 2021 Dec 6

382  
383 [12] **Li CL**, Bak A. Excitability characteristics of the A- and C-fibers in a peripheral nerve. *Exp Neurol*. 1976  
384 Jan;50(1):67-79.

385  
386 [13] **Crago PE**, Peckham PH, Mortimer JT, Van der Meulen JP. The choice of pulse duration for chronic electrical  
387 stimulation via surface, nerve, and intramuscular electrodes. *Ann Biomed Eng*. 1974 Sep;2(3):252-64.

388  
389 [14] **Moreno-Aranda J**, Seireg A. Electrical parameters for over-the-skin muscle stimulation. *J Biomech*.  
390 1981;14(9):579-85.

391  
392 [15] **Szlavik RB**, de Bruin H. The effect of stimulus current pulse width on nerve fiber size recruitment patterns.  
393 *Med Eng Phys*. 1999 Jul-Sep;21(6-7):507-15

394  
395 [16] **Doucet BM**, Lam A, Griffin L. Neuromuscular electrical stimulation for skeletal muscle function. *Yale J*  
396 *Biol Med*. 2012 Jun;85(2):201-15. Epub 2012 Jun 25.



- 398 [17] **Astrom M**, Diczfalusy E, Martens H, Wardell K. Relationship between neural activation and electric field  
399 distribution during deep brain stimulation. *IEEE Trans Biomed Eng.* 2015 Feb;62(2):664-672  
400
- 401 [18] **Anderson CJ**, Anderson DN, Pulst SM, Butson CR, Dorval AD. Neural selectivity, efficiency, and dose  
402 equivalence in deep brain stimulation through pulse width tuning and segmented electrodes. *Brain Stimul.* 2020  
403 Jul-Aug;13(4):1040-1050.  
404
- 405 [19] **Kern H**, Carraro U. Home-Based Functional Electrical Stimulation of Human Permanent Denervated  
406 Muscles: A Narrative Review on Diagnostics, Managements, Results and Byproducts Revisited 2020. *Diagnostics*  
407 (Basel). 2020 Jul 29;10(8):529.  
408
- 409 [20] **Gorgey AS**, Khalil RE, Alrubaye M, Gill R, Rivers J, Goetz LL, Cifu DX, Castillo T, Caruso D, Lavis TD,  
410 Lesnefsky EJ, Cardozo CC, Adler RA. Testosterone and long pulse width stimulation (TLPS) for denervated  
411 muscles after spinal cord injury: a study protocol of randomised clinical trial. *BMJ Open.* 2022 Oct  
412 5;12(10):e064748.  
413
- 414 [21] **Gosselin, M.-C.**, et al. (2014). Development of a new generation of high-resolution anatomical models for  
415 medical device evaluation: The virtual population 3.0. *Physics in Medicine and Biology*, 59(18), 5287–5303.  
416
- 417 [22] **Colella M**, Liberti M, Apollonio F, Bonmassar G. A Miniaturized Ultra-Focal Magnetic Stimulator and Its  
418 Preliminary Application to the Peripheral Nervous System. 2020 Aug 6. In: Makarov SN, Noetscher GM,  
419 Nummenmaa A, editors. *Brain and Human Body Modeling 2020: Computational Human Models Presented at*  
420 *EMBC 2019 and the BRAIN Initiative® 2019 Meeting* [Internet]. Cham (CH): Springer; 2021.  
421
- 422 [23] **Colella M**, Press DZ, Laher RM, McIlduff CE, Rutkove SB, Cassarà AM, Apollonio F, Pascual-Leone A,  
423 Liberti M, Bonmassar G. A study of flex miniaturized coils for focal nerve magnetic stimulation. *Med Phys.* 2023  
424 Mar;50(3):1779-1792  
425
- 426 [24] **Hasgall PA**, Di Gennaro F, Baumgartner C, Neufeld E, Lloyd B, Gosselin MC, Payne D, Klingenböck A,  
427 Kuster N, “IT’IS Database for thermal and electromagnetic parameters of biological tissues,” Version 4.1, Feb  
428 22, 2022, DOI: 10.13099/VIP21000-04-1.  
429
- 430 [25] **Desai SS**, Arbor TC, Varacallo M. Anatomy, Shoulder and Upper Limb, Musculocutaneous Nerve. [Updated  
431 2023 Sep 4]. In: StatPearls [Internet]. Treasure Island (FL): StatPearls Publishing; 2023 Jan-. Available from:  
432 <https://www.ncbi.nlm.nih.gov/books/NBK534199/>  
433
- 434 [26] **Bayot ML**, Nassereddin A, Varacallo M. Anatomy, Shoulder and Upper Limb, Brachial Plexus. [Updated  
435 2023 Jul 24]. In: StatPearls [Internet]. Treasure Island (FL): StatPearls Publishing; 2023 Jan-. Available from:  
436 <https://www.ncbi.nlm.nih.gov/books/NBK500016/>  
437
- 438 [27] **Kuhn A**, Keller T, Micera S, Morari M. Array electrode design for transcutaneous electrical stimulation: a  
439 simulation study. *Med Eng Phys.* 2009 Oct;31(8):945-51.  
440



- 441 [28] Ge Y, Ye S, Zhu K, Guo T, Su D, Zhang D, Chen Y, Chai X, Sui X. Mediating different-diameter A $\beta$  nerve  
442 fibers using a biomimetic 3D TENS computational model. *J Neurosci Methods*. 2020 Dec 1;346:108891.  
443
- 444 [29] Datta A, Bansal V, Diaz J, Patel J, Reato D, Bikson M. Gyri-precise head model of transcranial direct current  
445 stimulation: improved spatial focality using a ring electrode versus conventional rectangular pad. *Brain Stimul*.  
446 2009 Oct;2(4):201-7, 207.e1  
447
- 448 [30] McIntyre CC, Richardson AG, Grill WM. Modeling the excitability of mammalian nerve fibers: influence  
449 of afterpotentials on the recovery cycle. *J Neurophysiol*. 2002a Feb;87(2):995-1006. .  
450
- 451 [31] McIntyre, C. C., & Grill, W. M. (2002b). Extracellular stimulation of central neurons: Influence of stimulus  
452 waveform and frequency on neuronal output. *Journal of Neurophysiology*, 88(4), 1592–1604.  
453
- 454 [32] Gaines JL, Finn KE, Slopsema JP, Heyboer LA, Polasek KH. A model of motor and sensory axon activation  
455 in the median nerve using surface electrical stimulation. *J Comput Neurosci*. 2018 Aug;45(1):29-43.  
456
- 457 [33] Pelot NA, Behrend CE, Grill WM. Modeling the response of small myelinated axons in a compound nerve  
458 to kilohertz frequency signals. *J Neural Eng*. 2017 Aug;14(4):046022.  
459
- 460 [34] Samoudi AM, Kampusch S, Tanghe E, Széles JC, Martens L, Kaniusas E, Joseph W. Sensitivity Analysis  
461 of a Numerical Model for Percutaneous Auricular Vagus Nerve Stimulation. *Applied Sciences*. 2019; 9(3):540.  
462
- 463 [35] Roointan S, Tovbis D, Elder C, Yoo PB. Enhanced transcutaneous electrical nerve stimulation achieved by  
464 a localized virtual bipole: a computational study of human tibial nerve stimulation. *J Neural Eng*. 2020 May  
465 4;17(2):026041.  
466
- 467 [36] Anderson DN, Duffley G, Vorwerk J, Dorval AD, Butson CR. Anodic stimulation misunderstood:  
468 preferential activation of fiber orientations with anodic waveforms in deep brain stimulation. *J Neural Eng*. 2019  
469 Feb;16(1):016026.  
470
- 471 [37] Rattay F. Analysis of models for external stimulation of axons. *IEEE Trans Biomed Eng*. 1986  
472 Oct;33(10):974-7.  
473
- 474 [38] Duffley G, Anderson DN, Vorwerk J, Dorval AD, Butson CR. Evaluation of methodologies for computing  
475 the deep brain stimulation volume of tissue activated. *J Neural Eng*. 2019 Oct 29;16(6):066024.  
476
- 477 [39] Butson CR, Cooper SE, Henderson JM, McIntyre CC. Patient-specific analysis of the volume of tissue  
478 activated during deep brain stimulation. *Neuroimage*. 2007 Jan 15;34(2):661-70.  
479
- 480 [40] Badran BW, Yu AB, Adair D, Mappin G, DeVries WH, Jenkins DD, George MS, Bikson M. Laboratory  
481 Administration of Transcutaneous Auricular Vagus Nerve Stimulation (taVNS): Technique, Targeting, and  
482 Considerations. *J Vis Exp*. 2019 Jan 7;(143):10.3791/58984.  
483

- 484 [41] **Blair HA.** On the intensity-time relations for stimulation by electric currents. I. J Gen Physiol. 1932 Jul  
485 20;15(6):709-29.
- 486
- 487 [42] **Rattay F, Paredes LP, Leao RN.** Strength-duration relationship for intra- versus extracellular stimulation  
488 with microelectrodes. Neuroscience. 2012 Jul 12;214(5):1-13.
- 489
- 490 [43] **Niimi Y, Gomez-Tames J, Wasaka T, Hirata A.** Selective stimulation of nociceptive small fibers during  
491 intraepidermal electrical stimulation: Experiment and computational analysis. Front Neurosci. 2023 Jan  
492 13;16:1045942.
- 493
- 494 [44] **Kuhn A, Keller T, Lawrence M, Morari M.** A model for transcutaneous current stimulation: simulations and  
495 experiments. Med Biol Eng Comput. 2009 Mar;47(3):279-89.
- 496
- 497 [45] **Goffredo, M., Schmid, M., Conforto, S., Bilotti, F., Palma, C., Vegni, L., & D'Alessio, T.** (2014). A two-  
498 step model to optimise transcutaneous electrical stimulation of the human upper arm. Compel-the International  
499 Journal for Computation and Mathematics in Electrical and Electronic Engineering, 33(4), 1329–1345.
- 500
- 501 [46] **Zhu K, Li L, Wei X, Sui X.** A 3D Computational Model of Transcutaneous Electrical Nerve Stimulation for  
502 Estimating A $\beta$  Tactile Nerve Fiber Excitability. Front Neurosci. 2017 May 16;11:250.
- 503
- 504 [47] **Datta A, Zhou X, Su Y, Parra LC, Bikson M.** Validation of finite element model of transcranial electrical  
505 stimulation using scalp potentials: implications for clinical dose. J Neural Eng. 2013 Jun;10(3):036018.
- 506
- 507 [48] **Huang Y, Liu AA, Lafon B, Friedman D, Dayan M, Wang X, Bikson M, Doyle WK, Devinsky O, Parra LC.**  
508 Measurements and models of electric fields in the *in vivo* human brain during transcranial electric stimulation.  
509 Elife. 2017 Feb 7;6:e18834.
- 510
- 511 [49] **Coates S, Thwaites B.** The strength-duration curve and its importance in pacing efficiency: a study of 325  
512 pacing leads in 229 patients. Pacing Clin Electrophysiol. 2000 Aug;23(8):1273-7.
- 513
- 514 [50] **Deng ZD, Lisanby SH, Peterchev AV.** Electric field depth-focality tradeoff in transcranial magnetic  
515 stimulation: simulation comparison of 50 coil designs. Brain Stimul. 2013;6:1–13.
- 516
- 517 [51] **Haberbosch L, Datta A, Thomas C, et al.** Safety aspects, tolerability and modeling of retinofugal alternating  
518 current stimulation. Front Neurosci. 2019;13:783.
- 519
- 520 [52] **Truong DQ, Thomas C, Hampstead BM, Datta A.** Comparison of Transcranial Focused Ultrasound and  
521 Transcranial Pulse Stimulation for Neuromodulation: A Computational Study. Neuromodulation. 2022  
522 Jun;25(4):606-613.
- 523
- 524 [53] **Guillen A, Abbott CC, Deng ZD, Huang Y, Pascoal-Faria P, Truong DQ, Datta A.** Impact of modeled field  
525 of view in electroconvulsive therapy current flow simulations. Front Psychiatry. 2023 May 18;14:1168672.
- 526

527 [54] Roth Y, Amir A, Levkovitz Y, Zangen A. Three-dimensional distribution of the electric field induced in the  
528 brain by transcranial magnetic stimulation using figure-8 and deep H-coils. *J Clin Neurophysiol*. 2007;24:31–38.

529  
530 [55] Datta A, Dmochowski JP, Guleyupoglu B, Bikson M, Fregni F. Cranial electrotherapy stimulation and  
531 transcranial pulsed current stimulation: a computer based high-resolution modeling study. *Neuroimage*. 2013 Jan  
532 15;65:280-7.

533  
534 [56] Cakmak YO, Nazim K, Thomas C, Datta A. Optimized Electrode Placements for Non-invasive Electrical  
535 Stimulation of the Olfactory Bulb and Olfactory Mucosa. *Front Neurosci*. 2020 Nov 12;14:581503.

536  
537 [57] Truong DQ, Guillen A, Nooristani M, Maheu M, Champoux F, Datta A. Impact of galvanic vestibular  
538 stimulation electrode current density on brain current flow patterns: Does electrode size matter? *PLoS One*. 2023  
539 Feb 3;18(2):e0273883.

540  
541



**A**

medRxiv preprint doi: <https://doi.org/10.1101/2024.04.10.24305618>; this version posted April 15, 2024. The copyright holder for this preprint (which was not certified by peer review) is the author/funder, who has granted medRxiv a license to display the preprint in perpetuity. It is made available under a [CC-BY 4.0 International license](https://creativecommons.org/licenses/by/4.0/).

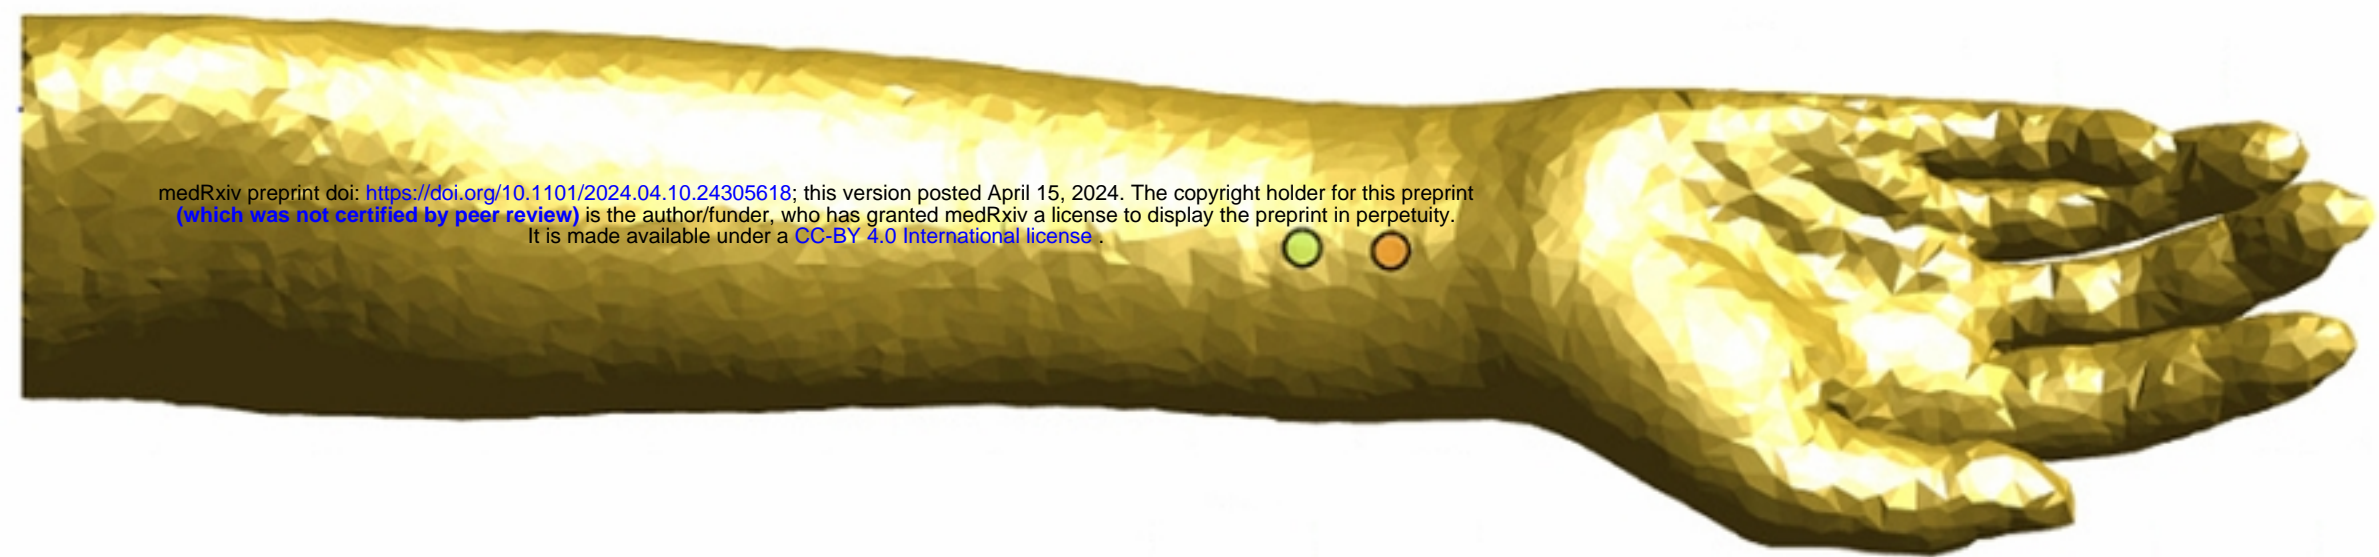**B**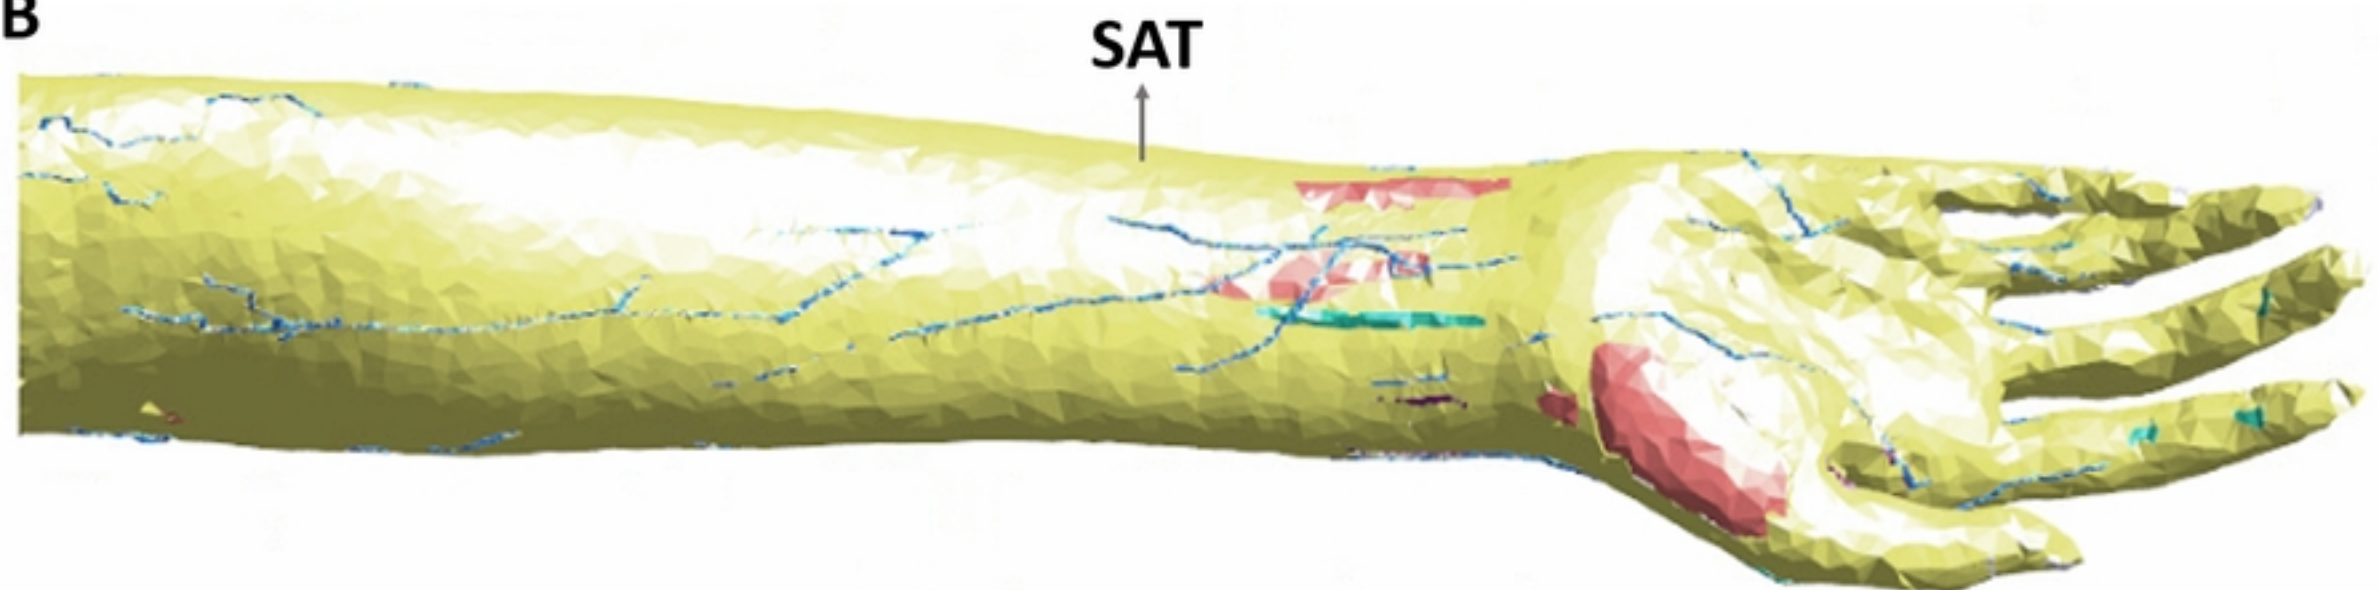**C**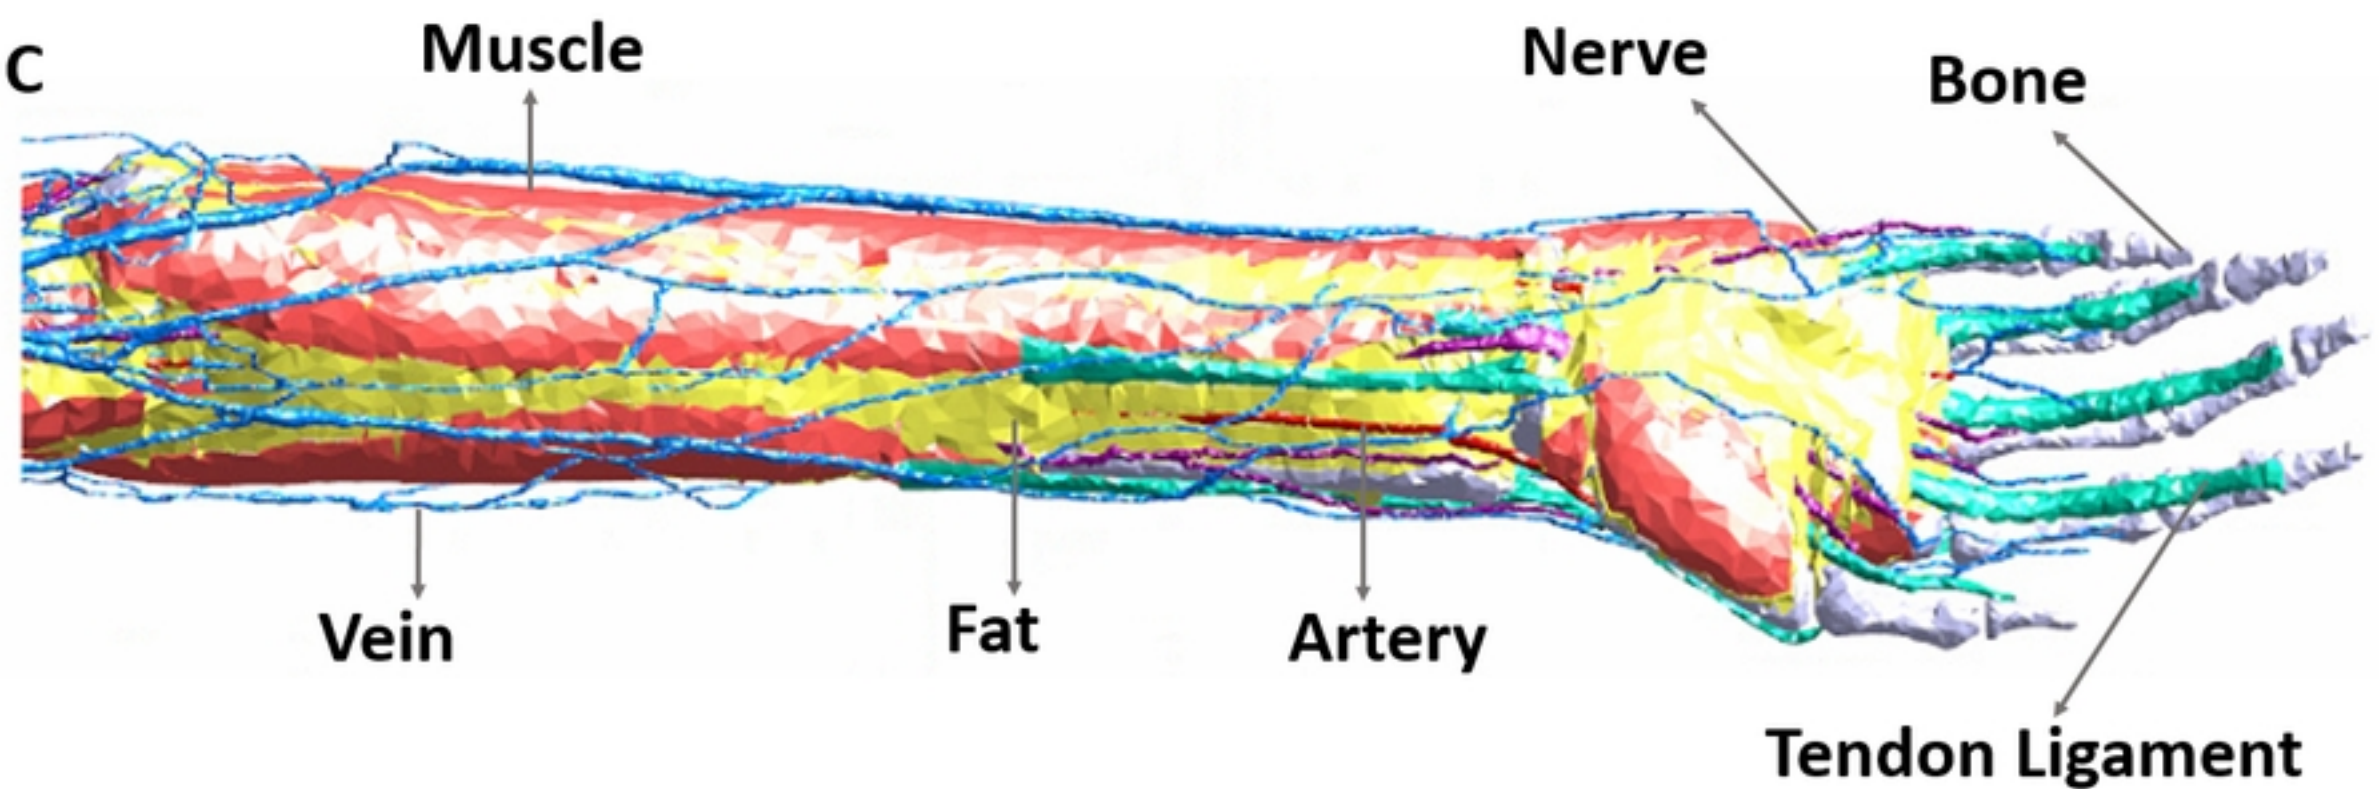

Figure 1



A

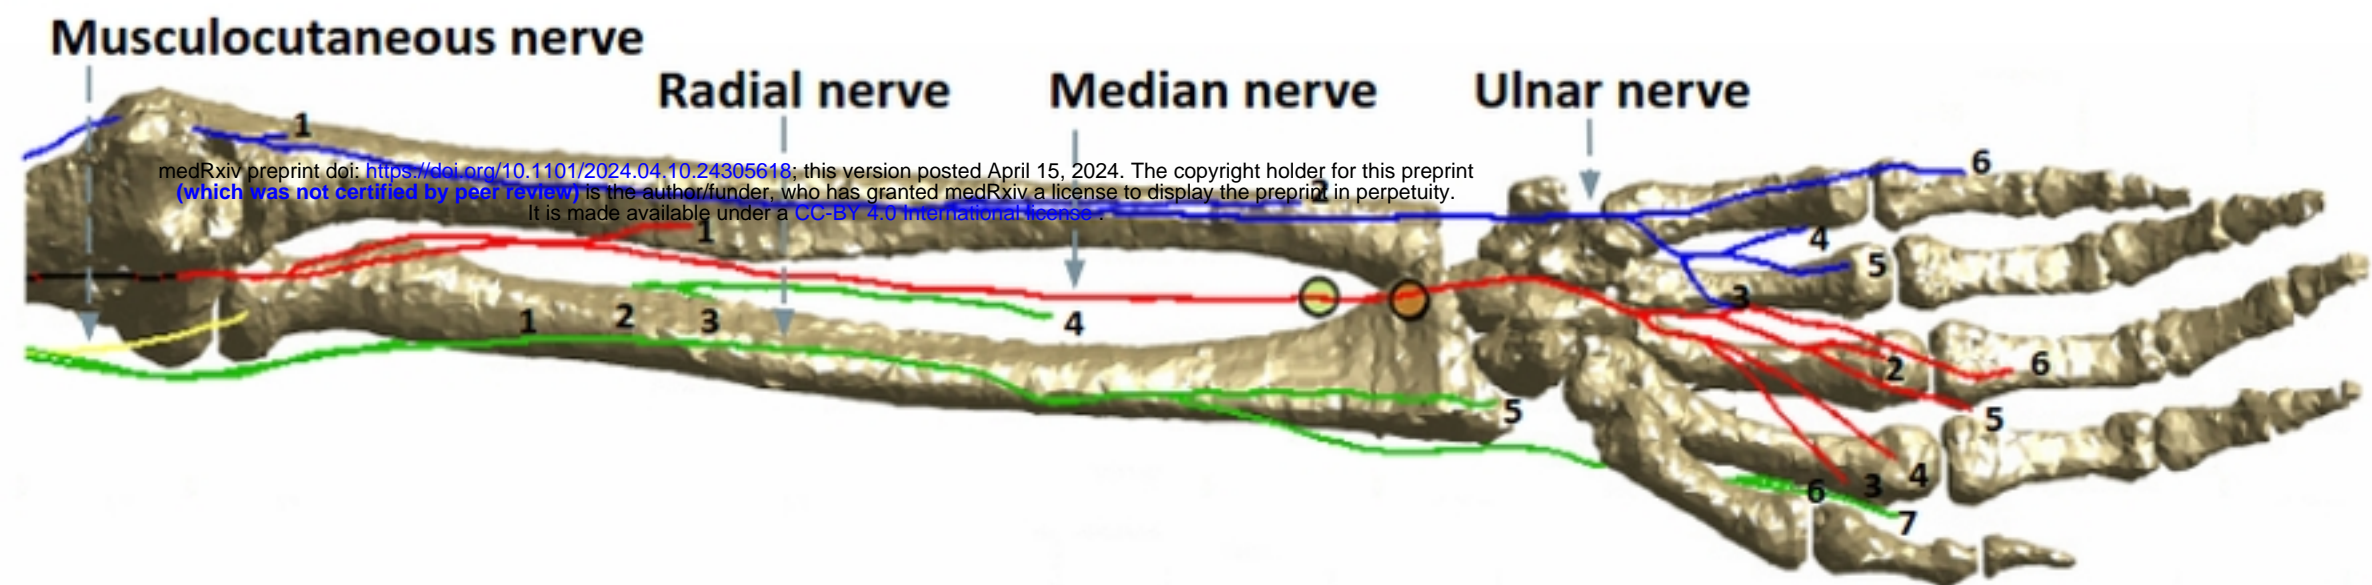

B

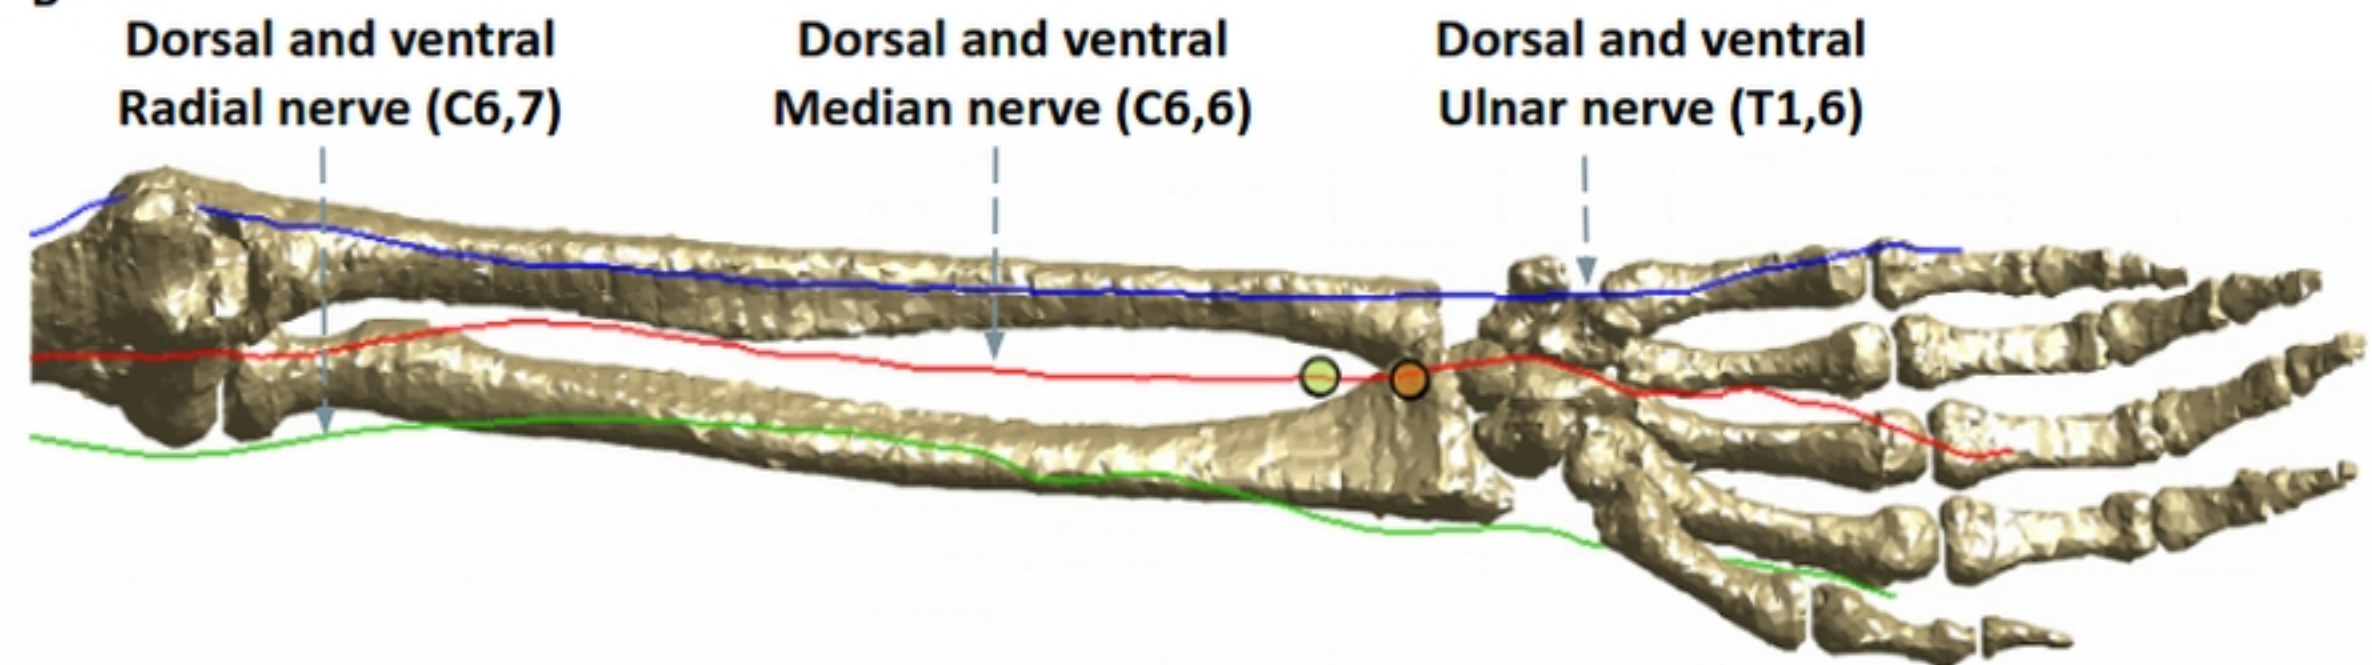

C

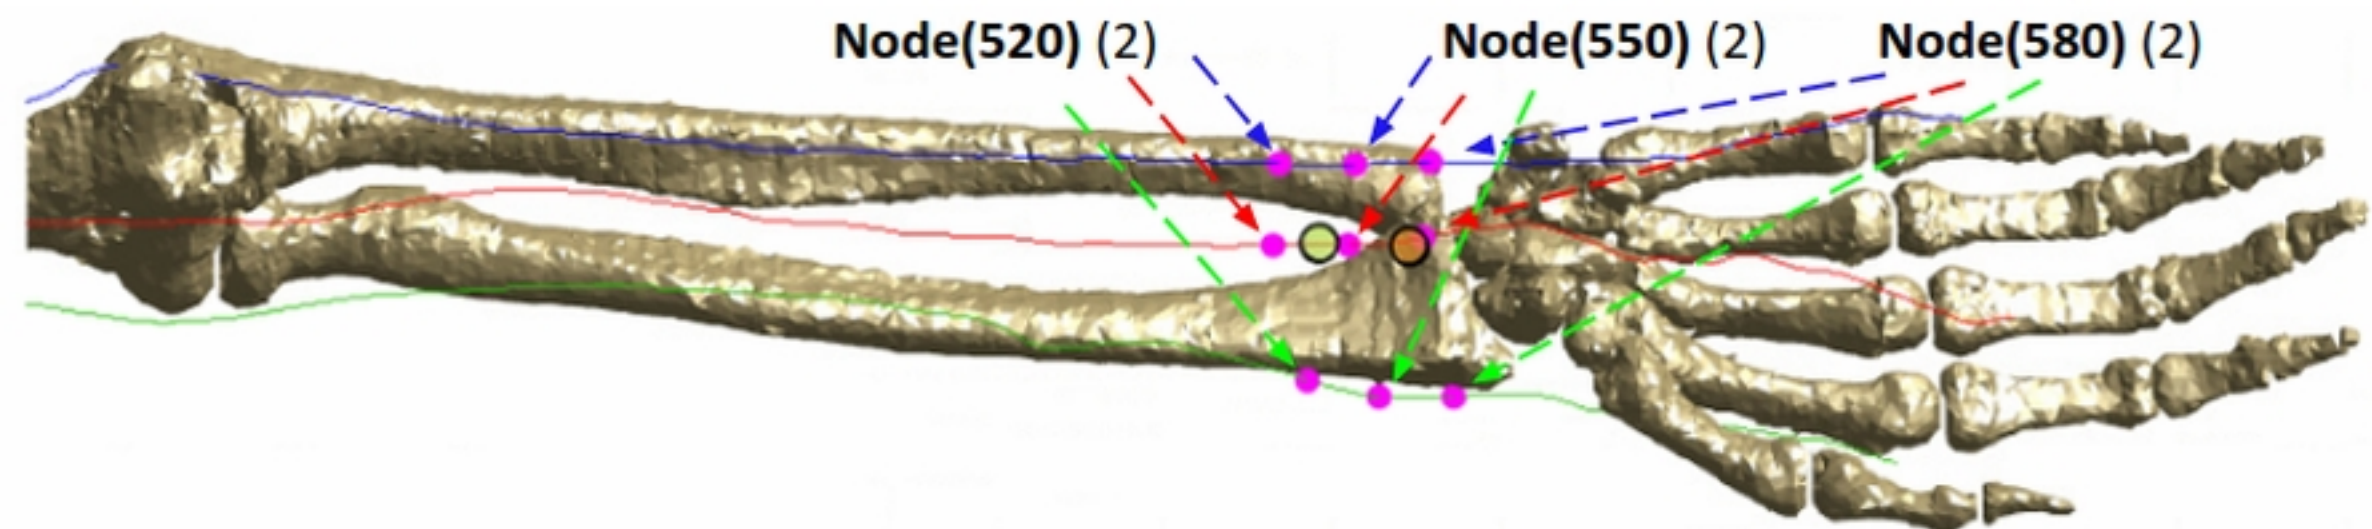

Figure 2

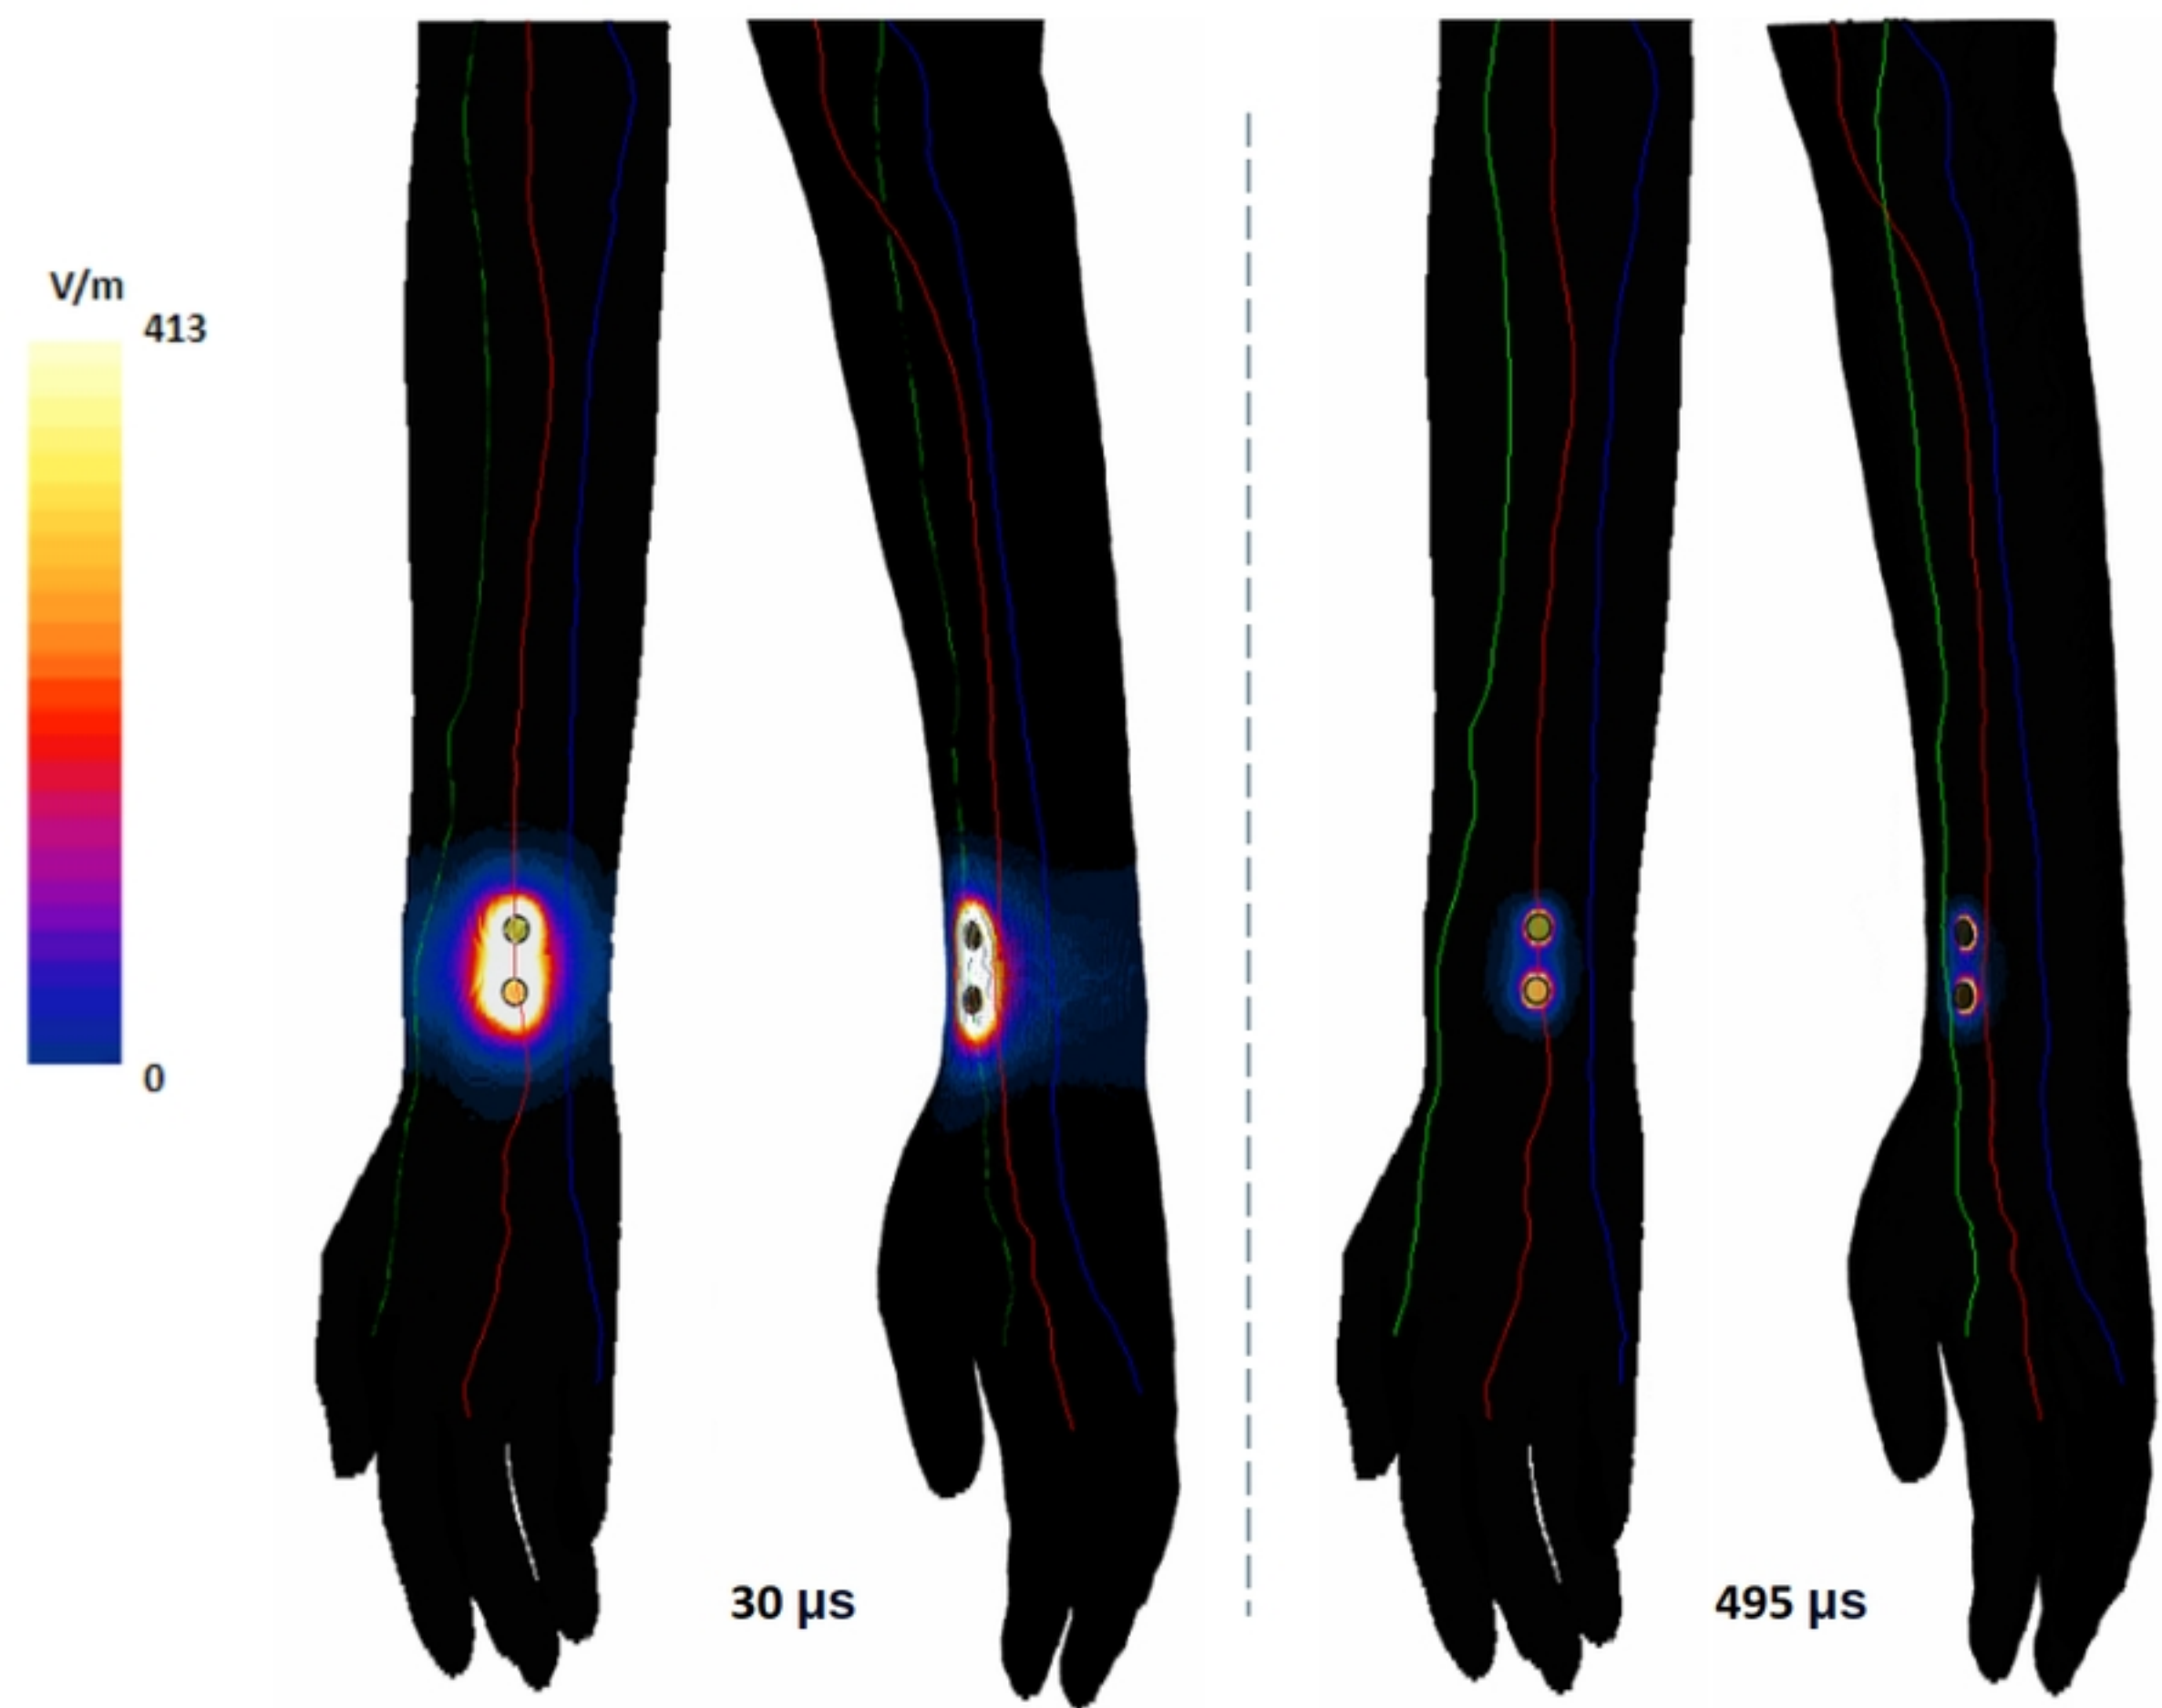

Figure 3



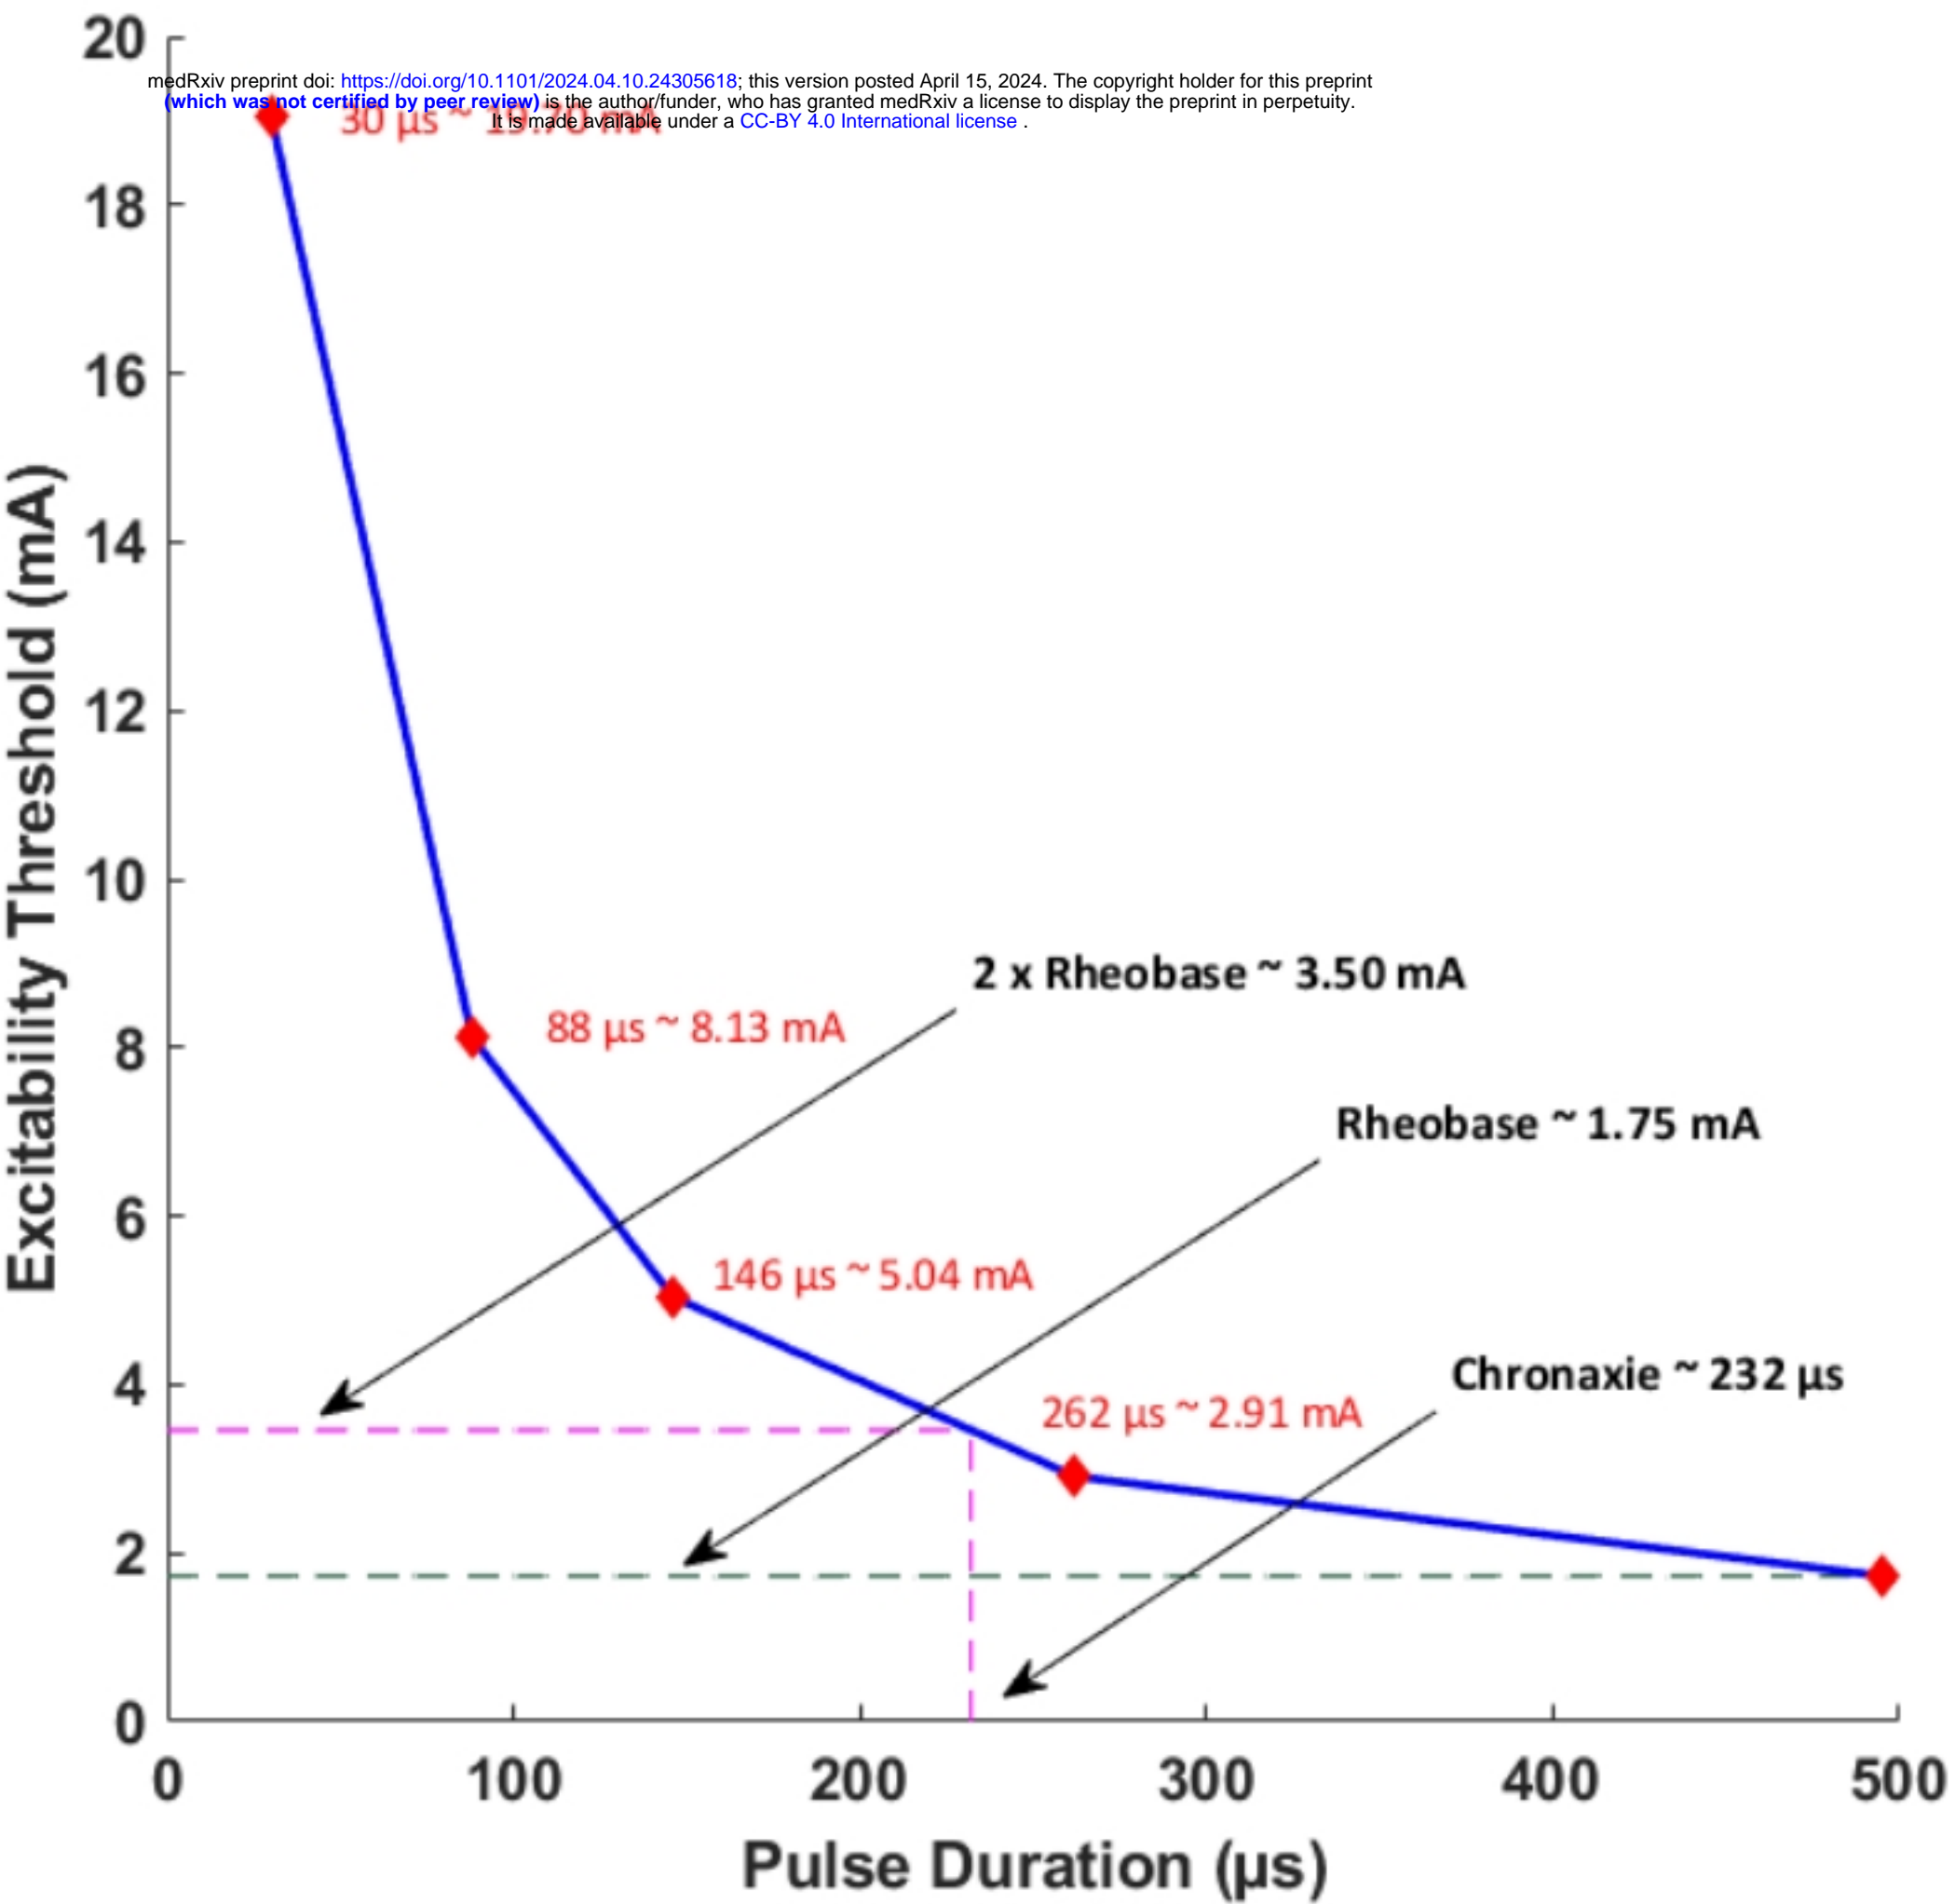

Figure 4

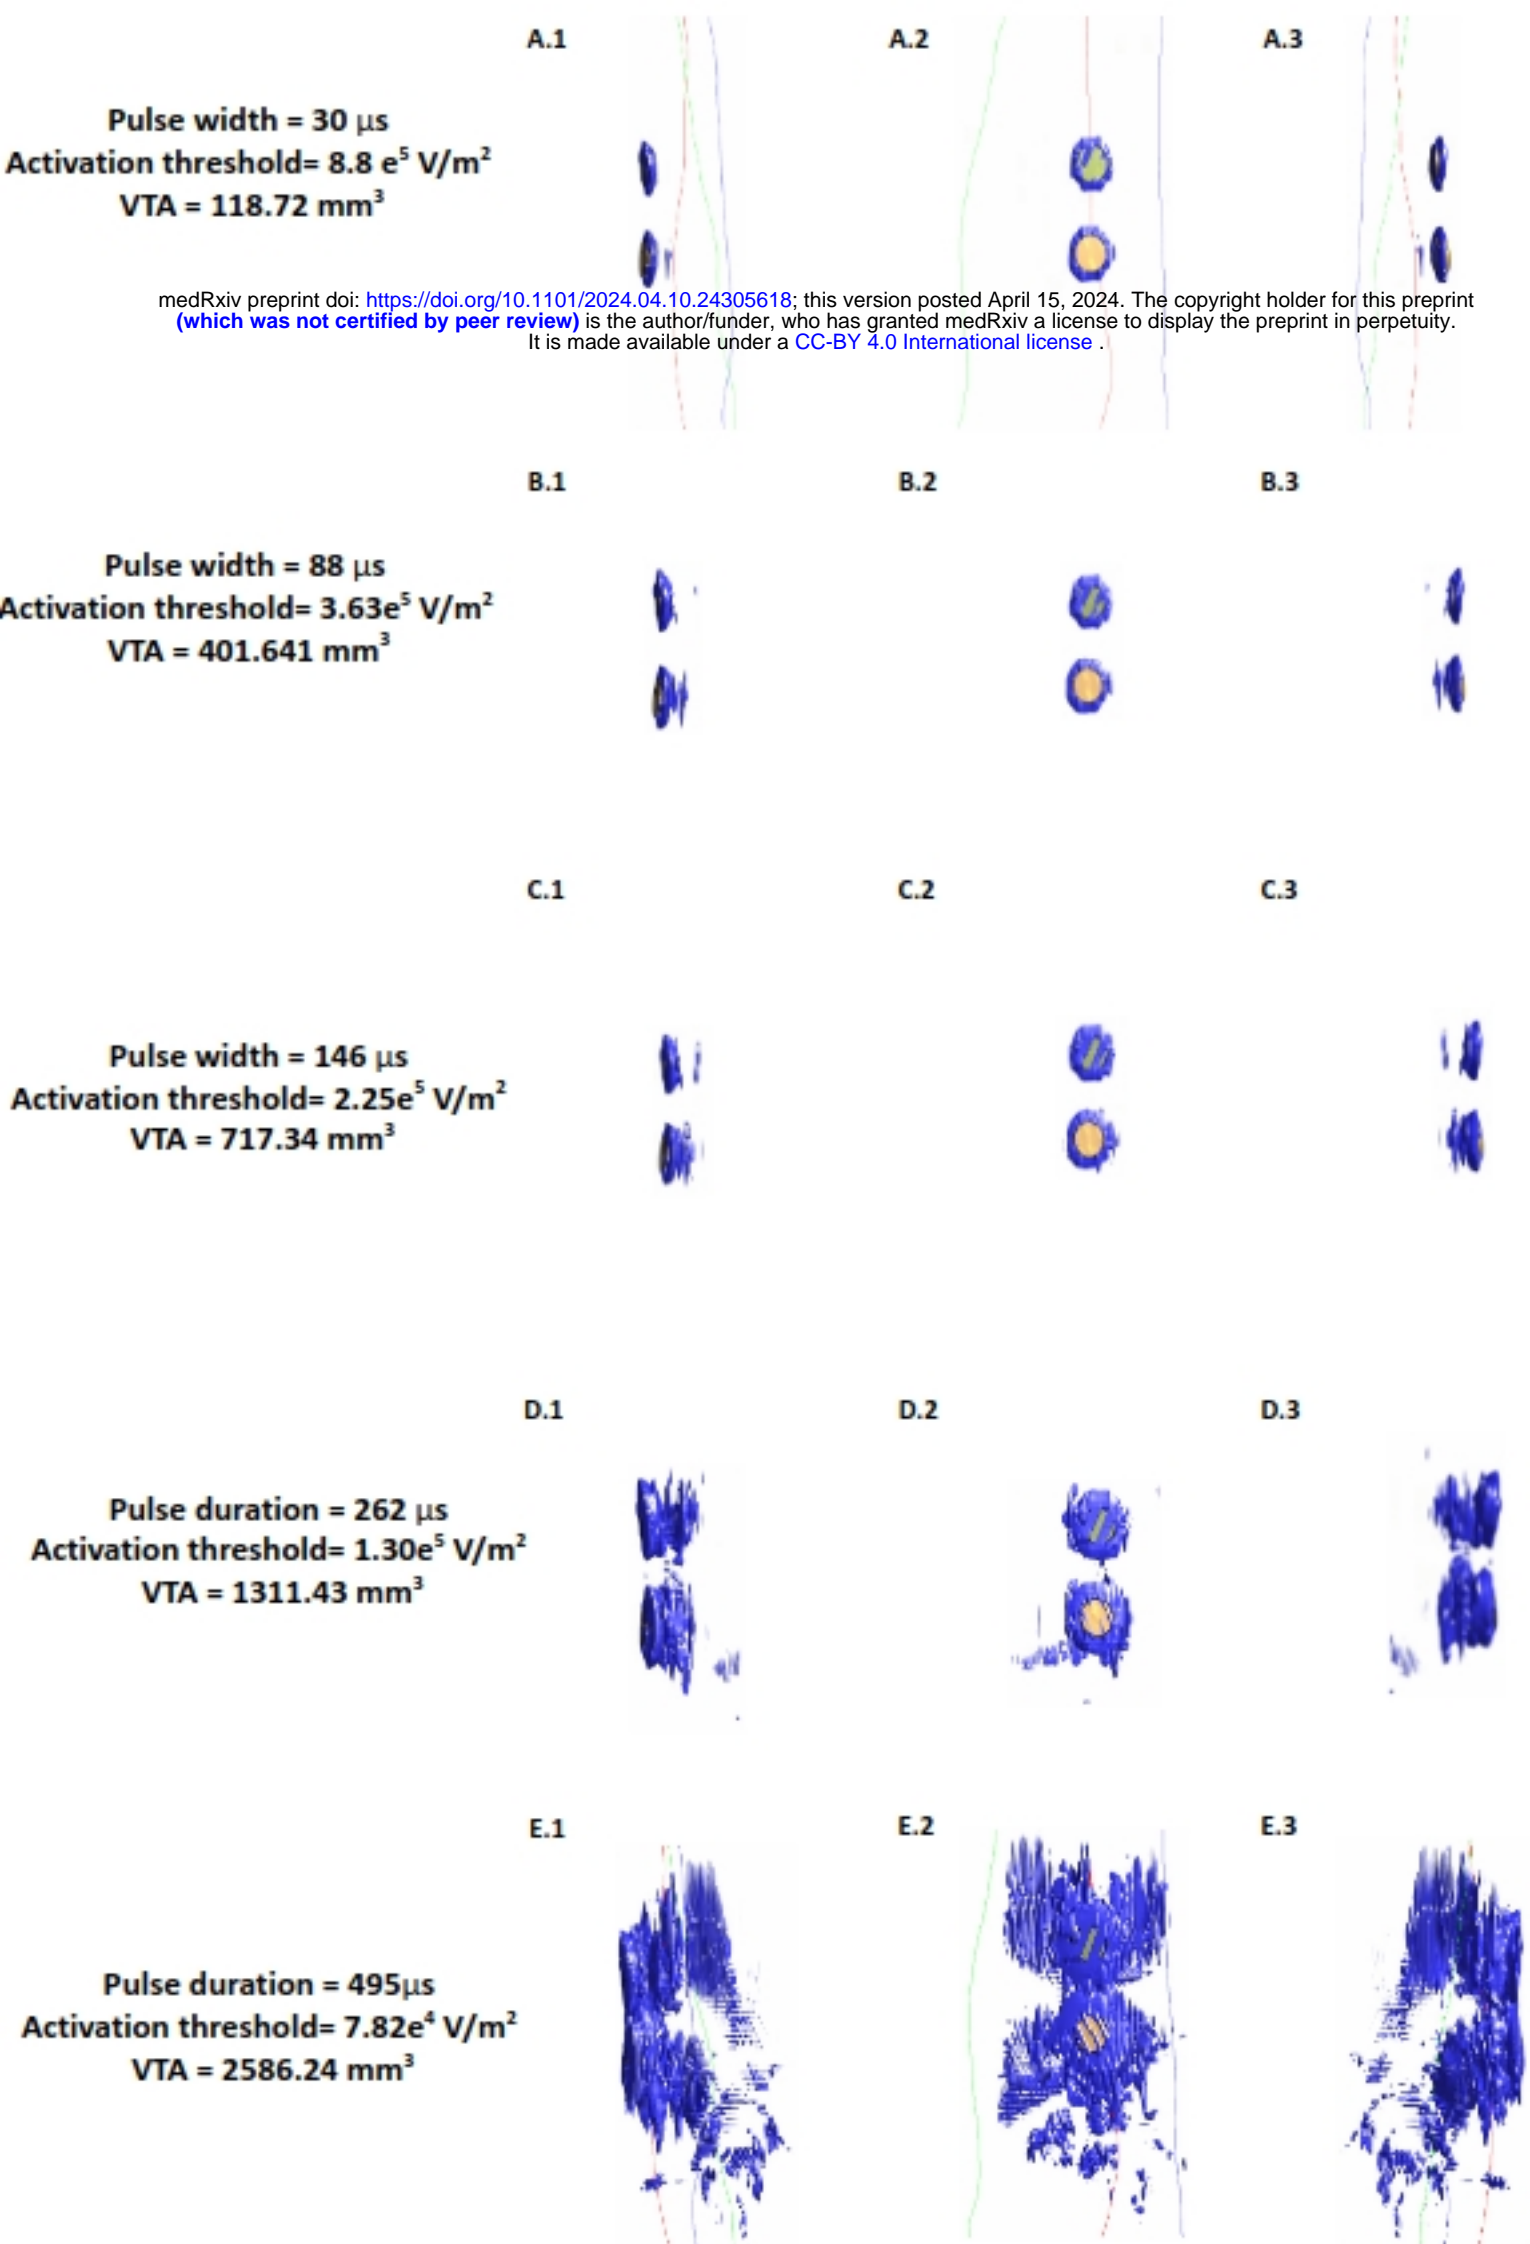

**Figure 5**



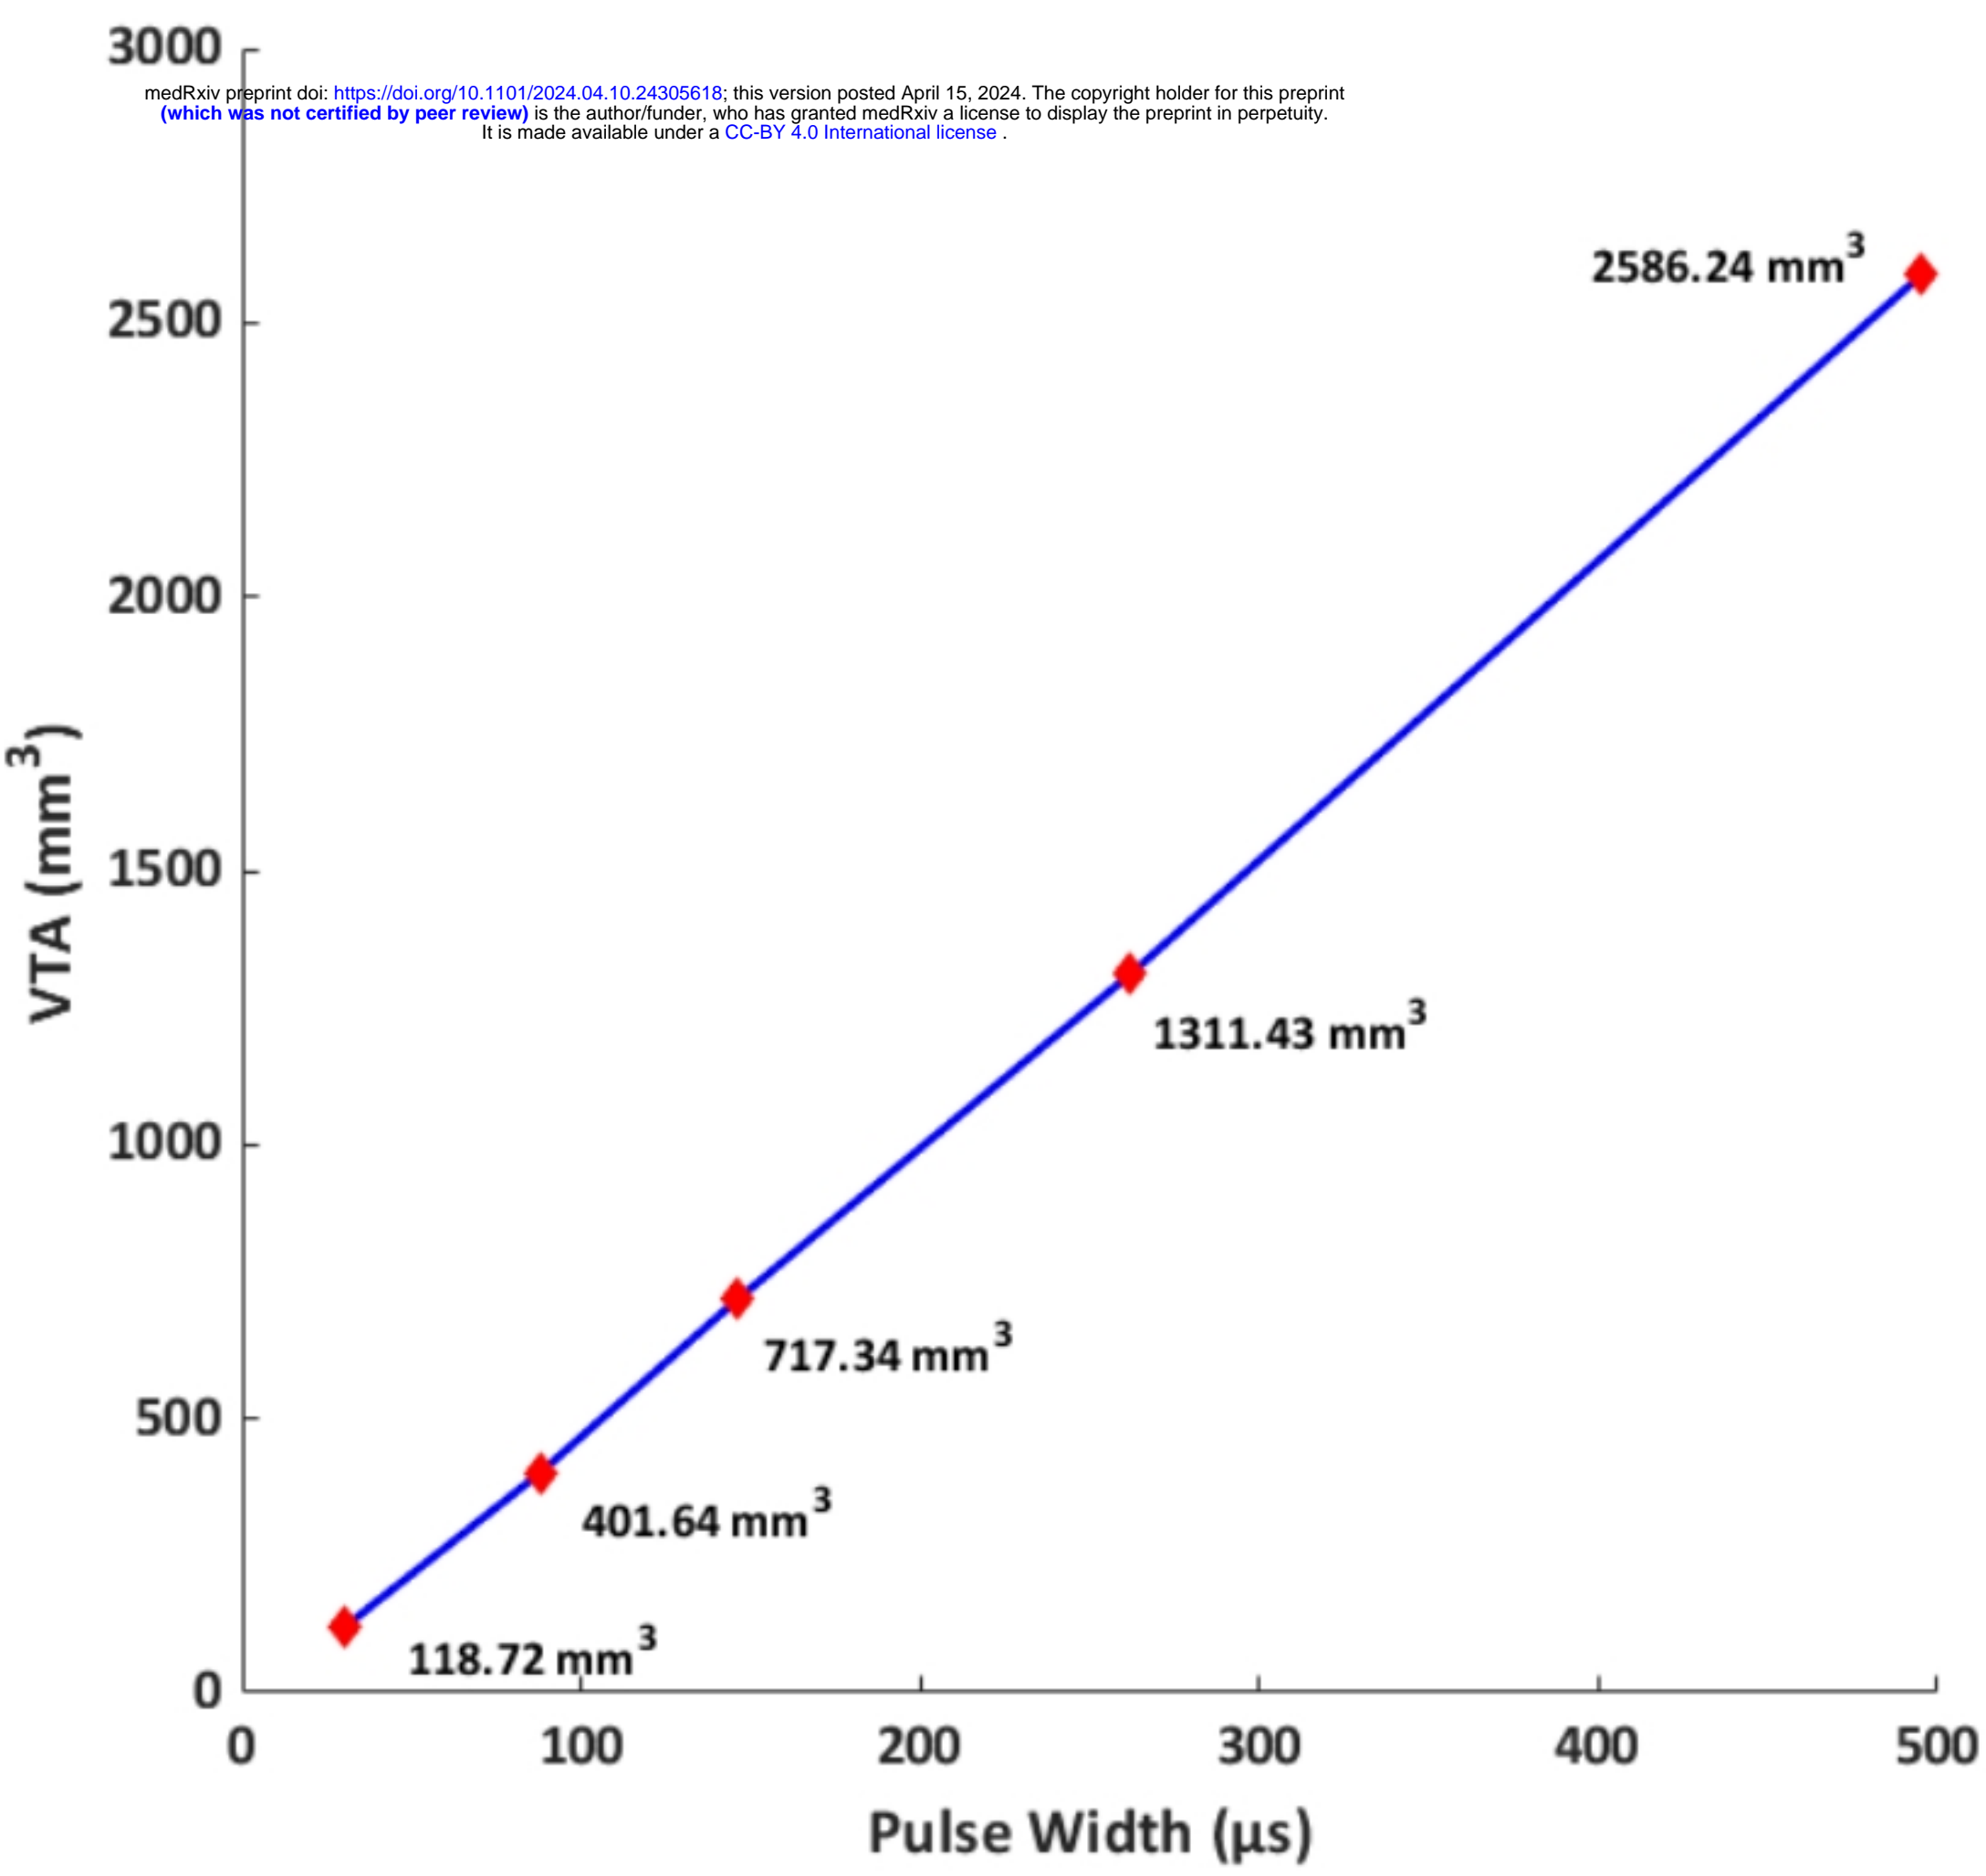

Figure 6
